1  
2  
3  
4  
5  
6  
7  
8  
9  
10  
11  
12  
13  
14  
15  
16  
17  
18

**Diversity and Distribution of a Novel Genus of Hyperthermophilic *Aquificae* Viruses Encoding a Proof-reading Family-A DNA Polymerase**

Marike Palmer<sup>1</sup>, Brian P. Hedlund<sup>1,2\*</sup>, Simon Roux<sup>3</sup>, Philippos K. Tsourkas<sup>1,2</sup>, Ryan K. Doss<sup>1</sup>, Casey Stamereilers<sup>1</sup>, Astha Mehta<sup>1</sup>, Jeremy A. Dodsworth<sup>4</sup>, Michael Lodes<sup>5</sup>, Scott Monsma<sup>5</sup>, Tijana Glavina del Rio<sup>3</sup>, Thomas W. Schoenfeld<sup>6</sup>, Emiley A. Eloef-Fadrosh<sup>3</sup>, and David A. Mead<sup>7\*</sup>

<sup>1</sup>School of Life Sciences, University of Nevada, Las Vegas, Las Vegas NV, USA

<sup>2</sup>Nevada Institute of Personalized Medicine, University of Nevada, Las Vegas, Las Vegas NV, USA

<sup>3</sup>Department of Energy Joint Genome Institute, Berkeley, California, USA

<sup>4</sup>Department of Biology, California State University, San Bernardino, San Bernardino, CA, USA

<sup>5</sup>Lucigen Corporation, Middleton WI, USA

<sup>6</sup>Tamarack Bioscience, Beverly MA, USA

<sup>7</sup>Varigen Biosciences, Madison WI, USA

Corresponding authors: David A. Mead, [dmead@varigenbio.com](mailto:dmead@varigenbio.com); Brian P. Hedlund, [brian.hedlund@unlv.edu](mailto:brian.hedlund@unlv.edu)

19 **ABSTRACT**

20 Despite the high abundance of *Aquificae* in many geothermal systems, these bacteria are difficult to culture  
21 and no viruses infecting members of this phylum have been isolated. Here, we describe the complete,  
22 circular dsDNA Uncultivated Virus Genome (UViG) of *Thermocrinis* Octopus Spring virus (TOSV),  
23 derived from metagenomic data, along with eight related UViGs representing three additional species,  
24 *Thermocrinis* Great Boiling Spring virus (TGBSV), *Aquificae* Joseph's Coat Spring Virus (AJCSV), and  
25 *Aquificae* Conch Spring Virus (ACSV). Four near-complete UViGs, ranged from 37,256 bp to 41,208 bp  
26 and encoded 48 to 53 open reading frames. Despite low overall similarity between viruses from different  
27 hot springs, the genomes shared a high degree of synteny, and encoded numerous genes for nucleotide  
28 metabolism, including a polyprotein PolA-type polymerase with likely accessory functions, a DNA Pol III  
29 beta subunit (sliding clamp), a thymidylate kinase, a DNA gyrase, a helicase, and a DNA methylase. Also  
30 present were conserved genes predicted to code for phage capsids, large and small terminases, portal  
31 protein, holin, and lytic transglycosylase, all consistent with a distant relatedness to cultivated  
32 *Caudovirales*. TOSV and TGBSV had the highest coverage in their respective metagenomes and are  
33 predicted to infect *Thermocrinis ruber* and *Thermocrinis jamiesonii*, respectively, as multiple CRISPR  
34 spacers matching the viral genomes were identified within *Thermocrinis ruber* OC1/4<sup>T</sup> and *Thermocrinis*  
35 *jamiesonii* GBS1<sup>T</sup>. Based on the predicted, unusual bi-directional replication strategy, low sequence  
36 similarity to known viral genomes, and a unique position in gene-sharing networks, we propose a new  
37 putative genus, Pyrovirus, in the order *Caudovirales*.

## 38 INTRODUCTION

39 Viruses are the most abundant biological entities on Earth and are important drivers of genetic  
40 exchange, secondary production, and host metabolism on both local and global scales (Breitbart et al., 2018;  
41 Fuhrman 1999; Rohwer and Thurber 2009; Suttle 2007). They also possess a high density of nucleic acid-  
42 synthesis and -modifying enzymes that are important sources of enzymes for the biotechnology sector.  
43 Despite their importance, cultivation of viruses in the laboratory is limited by challenges associated with  
44 cultivating their hosts. This problem is particularly true for viruses of thermophiles and hyperthermophiles  
45 because many hosts remain uncultured. Also, most thermophiles do not readily form lawns on solid media,  
46 which are typically exploited to screen for plaques. Although direct observation of filtrates from geothermal  
47 springs and enrichments has revealed a high diversity of virus morphotypes (Rice et al., 2001; Rachel et  
48 al., 2002), few thermophilic viruses have been studied in enrichment cultures and even fewer have been  
49 isolated in culture with their host. Currently, the NCBI Viral Genomes database lists 59 thermophilic  
50 archaeal viruses out of 95 total genomes, representing ten families  
51 (<http://www.ncbi.nlm.nih.gov/genomes/GenomesGroup.cgi?taxid=10239&host=archaea>;  
52 2/3/20); however, 49 of these infect members of the thermoacidophilic family *Sulfolobaceae*, leaving other  
53 archaeal thermophiles vastly under-explored. Similarly, only 15 of the 2,500 bacteriophage genomes  
54 represent thermophilic or hyperthermophilic viruses, representing only three virus families  
55 (<http://www.ncbi.nlm.nih.gov/genomes/GenomesGroup.cgi?taxid=10239&host=bacteria>;  
56 2/3/20). Strikingly, although members of the phylum *Aquificae* (syn. *Aquificota*) predominate in many  
57 terrestrial and marine high-temperature ecosystems (Reysenbach et al., 2005; Spear et al., 2005), to date,  
58 no cultivated viruses infecting *Aquificae* have been described.

59 Microbial ecologists have increasingly turned to cultivation-independent approaches to probe  
60 microbial diversity in nature. Although the low nucleic acid content and lack of universal conserved marker  
61 genes slowed the development of viral metagenomics, this field is now in full swing (Emerson et al., 2018;  
62 Koonin et al., 2018; Paez-Espino et al., 2016). One of the early viral metagenomic investigations focused  
63 on Octopus Spring and other circumneutral pH springs in Yellowstone National Park (Schoenfeld et al.,  
64 2008), revealing 59 putative DNA polymerase (*pol*) genes, which were subsequently screened for  
65 heterologous activity in *E. coli* (Moser et al., 2012). The most thermophilic of these enzymes, 3173 PolA,  
66 also demonstrated high-fidelity, thermostable reverse-transcriptase (RT) activity, and strand-displacement  
67 activity and was subsequently marketed by Lucigen Corporation as a single-enzyme RT-PCR system called  
68 PyroPhage and RapidDxFire. That enzyme was further improved by molecular evolution and fusion of a  
69 high-performance chimeric variant of 3173 PolA with the 5' to 3' exonuclease domain of *Taq* polymerase  
70 to improve probe-based detection chemistries and enable highly sensitive detection of RNA (Heller et al.,  
71 2019).

72 A study of the diversity and evolution of 3173 PolA and related polymerases revealed clues about  
73 its complex evolutionary history (Schoenfeld et al., 2013). In addition to their discovery in viral  
74 metagenomes from hot springs, 3173 *polA*-like genes were also detected in two of the three families of  
75 *Aquificae*, where they have orthologously replaced host DNA *polA* genes, and phylogenetically diverse,  
76 non-thermophilic bacteria, where they appear to be transient alternative *polA* genes, presumably due to  
77 recombination following non-productive infections. Amazingly, 3173 *polA*-like genes are also known to  
78 encode thermophilic, nuclear-encoded, apicoplast-targeted polymerases in eukaryotic parasites in the  
79 *Apicomplexa* (e.g., *Plasmodium*, *Babesia*, and *Toxoplasma*) (Seow et al., 2005). The origin of these genes  
80 likely involved fixation of a progenitor sequence into the nuclear genome following endosymbiosis of a red  
81 alga (proto-apicoplast) containing a bacterial symbiont carrying a viral *polA* (Schoenfeld et al., 2013).

82 Recently, an Uncultivated Virus Genome (UViG) containing the 3173 *polA* gene was described  
83 (Mead et al., 2018). Here, we further describe the OS3173 virus genome and related UViGs, including  
84 nearly complete UViGs from several Yellowstone springs and Great Boiling Spring (GBS), Nevada, that  
85 range from 37,256 bp to 41,208 bp and encode 48 to 53 open reading frames. The presence of fragments of  
86 these genomes in CRISPR arrays encoded by *Thermocrinis ruber* OC1/4<sup>T</sup>, *Thermocrinis jamiesonii* GBS1<sup>T</sup>,  
87 *Hydrogenobaculum* sp. 3684, and *Sulfurihydrogenibium yellowstonense* SS-5<sup>T</sup> genomes, along with  
88 similarity between many viral genes and *Aquificaceae* genes, supports the previous hypothesis (Mead et  
89 al., 2018; Schoenfeld et al., 2013) that *Thermocrinis* and probably other *Aquificae* are putative hosts of  
90 these viruses. The high abundance of these viruses and their hosts suggests they may play an important role  
91 in chemolithotrophic productivity in geothermal springs globally, in addition to their role in evolution as a  
92 vector for horizontal gene transfer.

93

## 94 **RESULTS AND DISCUSSION**

### 95 **DOMINANT VIRAL UViGS FROM OCTOPUS SPRING AND GREAT BOILING SPRING ENCODES** 96 **AN UNUSUAL DNA POLYMERASE**

97 Viral particles were isolated from Octopus Spring in Yellowstone National Park and Great Boiling  
98 Spring (GBS) in the U.S. Great Basin by sequential tangential-flow filtration (Schoenfeld et al., 2008) and  
99 used for metagenomic sequencing (Mead et al., 2018). In parallel, the cell fraction from GBS was also used  
100 for metagenomic sequencing. Forty-three percent of the reads from the Octopus Spring virus-enriched  
101 metagenome assembled into a single contig herein called *Thermocrinis* Octopus Spring virus (TOSV,  
102 equivalent to the term OS3173 used previously (Mead et al., 2018)). The TOSV genome was 37,256 bp and  
103 encoded 48 predicted open reading frames (Figure 1A, S1A), as detailed below. Metagenomic coverage  
104 was high (mean 913X) and uniform across the TOSV genome above 95% nucleotide identity, and read  
105 depth was low at lower identity (Figure S1B,C). Together, these data indicate that TOSV was likely the

106 dominant virus present at the time and place of sampling. Among the 48 predicted genes (Supplementary  
107 File S3) was a full-length, polyprotein PolA-type polymerase nearly identical to 3173 PolA (Figure 2), a  
108 portion of which was previously discovered via Sanger sequencing of metagenomic clone libraries  
109 (Schoenfeld et al., 2008). The near-complete absence of TOSV reads from a pink streamer microbial  
110 metagenome dominated by *Thermocrinis* from the outflow of Octopus Spring (Takacs-Vesbach et al., 2013)  
111 suggests viral activity is temporally or spatially variable in that environment (Supplementary File S1).

112 Other viral contigs with lower coverage present in the Octopus Spring virus-enriched metagenome  
113 (Figure 4, S2, S3) were similar to *Pyrobaculum* Spherical Virus (PSV) (Häring et al., 2004), a member of  
114 the *Globuloviridae*, which was previously described in Octopus Spring viral metagenomes (Schoenfeld et  
115 al., 2008; Mead et al., 2018), or distantly related to *Siphoviridae* viruses infecting mesophilic *Actinobacteria*  
116 or *Leptospira* (Figure S3) (Supplementary File S1).

117 A similar viral contig encoding a 3173 PolA-like protein (Figure 2), herein putatively named  
118 *Thermocrinis* Great Boiling Spring virus (TGBSV), was obtained from the GBS cell metagenome. The  
119 TGBSV genome is 41,208 bp and encodes 53 putative open reading frames (Figure 1B, S4A). Genomic  
120 coverage was low across the majority of the genome (mean 15.4X), yet it was highly variable in the  
121 intergenic regions on either end of the linear contig (Figure S4B,C). TGBSV reads were also recruited from  
122 the GBS virus-enriched metagenome at 50.4X coverage, where TGBSV was the viral contig with the  
123 highest coverage (Supplementary File S1), although the *de novo* assembly was fragmented. In contrast to  
124 Octopus Spring, the high recruitment of viral reads from the GBS cellular metagenomes suggests active  
125 infection of *Thermocrinis jamiesonii* in GBS during the time of sampling.

126 Other contigs from the GBS virus-enriched metagenome (Figure S5, S6) were distantly related to  
127 viruses from halophilic *Euryarchaeota*, various *Sulfolobales* viruses, and PSV (Figure S6). *Pyrobaculum*  
128 is relatively abundant in GBS (Costa et al., 2009; Cole et al., 2013); however, *Sulfolobales* are not known  
129 to occur at GBS, as no high-temperature, low-pH habitat is known to exist there. Due to the small size of  
130 these contigs and large genetic distance to characterized relatives, these relationships are highly uncertain.

131 The virus-enriched metagenomes from Octopus Spring and GBS are summarized in Supplementary  
132 File S1, including read recruitment, vContact 2.0 files, and CRISPR spacer matches of the 10 viral contigs  
133 with the highest coverage from these metagenomes.

134

## 135 RECOVERY OF TOSV-LIKE GENOMES FROM YELLOWSTONE AND GREAT BASIN SPRING 136 METAGENOMES

137 To assess the distribution and diversity of similar viruses, the full-length 3173 PolA gene of TOSV  
138 was used to recruit homologs *in silico* from public databases. In total, 23 unique contigs containing 3173  
139 *polA*-like genes were obtained from cell and virus-enriched metagenomes from Yellowstone and U.S. Great

140 Basin hot springs (Table 1) (Figure 2). The Yellowstone springs, specifically Octopus Spring, Conch  
141 Spring, Joseph's Coat Spring (Scorodite Spring), and Calcite Spring, span several geothermal areas; each  
142 is circumneutral (pH 6.0 to 8.8) and has a source that is boiling or near-boiling, and several are known to  
143 host abundant populations of *Aquificae* (Reysenbach et al., 1994; Reysenbach et al., 2000). In the Great  
144 Basin, Great Boiling Spring and Sandy's Spring West are only ~1 km apart (Costa et al., 2009), but Little  
145 Hot Creek is ~380 km away, and each is separated from the Yellowstone springs by >1,200 km. These  
146 springs also share a circumneutral pH, near-boiling sources, and abundant *Aquificae* populations (Costa et  
147 al., 2009; Cole et al., 2013; Vick et al., 2010).

148 Phylogenetic analysis of the near-complete 3173 PolA-like proteins revealed four well-supported  
149 groups that were mostly site-specific (Figure 2), except that one of two Pols from Conch Spring grouped  
150 with several from Octopus Spring in Group 1, whereas a distinct Conch Spring Pol split off at the most  
151 basal node in the phylogeny (Group 4). Additionally, the Pols from the two pyrite-precipitating springs,  
152 Joseph's Coat Spring and Calcite Spring, grouped together in Group 3. The Pols from Great Basin springs  
153 were monophyletic and distinct from the Yellowstone Pols, forming Group 2, following a pattern seen for  
154 several thermophilic bacteria and archaea (Dodsworth et al., 2015; Miller-Coleman et al., 2012; Zhou et  
155 al., 2019). All the full-length 3173 PolA-like proteins contained a 3'-5' proofreading exonuclease and DNA  
156 polymerase (3'exo/pol) domain, as is typical of many bacterial PolAs. Several also contained putative  
157 helicase domains (DUF 927), described later in detail; however, this domain was fused to form a putative  
158 polyprotein in Groups 1 and 2, or alternatively present as a separate open reading frame in the four most  
159 divergent Pols, all from springs north of Yellowstone Lake (Groups 3 and 4) (Figure 2). Each of the  
160 metagenomes contained only one of the Pol variants, except for the previously mentioned Conch Spring  
161 Pols.

162 Nine of the contigs containing the genes encoding the 3173 PolA-like proteins were >23 kbp and  
163 were thus considered UViGs (Figure 3, Supplemental Table S1). All nine UViGs were compared by tBlastx  
164 to identify other regions of homology and assess genomic synteny (Figure 3). Within the groups previously  
165 identified by the Pol phylogeny, shared gene content and synteny were both high. Shared gene content and  
166 synteny between the groups was considerably lower, reflecting low average amino acid identities (Figure  
167 4C); however, some of the core genes were organized similarly even in the most distant genomes, including  
168 the polymerase/helicase, terminase subunits, and phage capsid proteins, described in detail below.

169 For the classification of these nine UViGs, vContact2 was used to delineate genus-level groups for  
170 four representatives, one from each group in the Pol phylogeny, consisting of TOSV/OS3173 (Group 1),  
171 TGBSV (Group 2), *Aquificae* Joseph's Coat Virus (AJCV) (Group 3), and *Aquificae* Conch Spring Virus  
172 (ACSV) (Group 4) (Figure 1; Table 2). The four representative UViGs were connected as a single  
173 component of the gene-sharing network (Figure 4A), with representatives from all four groups forming a



174 single putative genus (proposed Pyrovirus) (Figure 4B). One outlier in the network, partially connected to  
175 the Pyrovirus component, was *Hydrogenobaculum* phage 1 (Figure 4A,B, S7) (Gudbergdóttir et al., 2016),  
176 a 19,351 bp UViG recovered from a metagenome from Grensdalur, Iceland that was assigned to  
177 *Hydrogenobaculum* based on CRISPR spacer matches to genomes from cultivated *Hydrogenobaculum*  
178 strains. A second outlier (below the Pyrovirus group, Figure 4B) was obtained from a microbial  
179 metagenome of a pink streamer community from Octopus Spring. The gene-sharing network also  
180 illuminated some other viral contigs from the Octopus Spring and GBS viromes, belonging to gene-sharing  
181 sub-networks with PSV and *Thermoproteus tenax* spherical virus 1 (TTSV) (Ahn et al., 2006),  
182 Hyperthermophilic archaeal virus 1 (HAV) (Garrett et al., 2010), and *Microviridae*, among other isolated  
183 clusters. No genomes belonging to the primary *Myoviridae* or *Siphoviridae* networks were present in the  
184 hot spring metagenomes, reflecting the unique gene content of hyperthermophilic viruses.

185

## 186 UNUSUAL BI-DIRECTIONAL GENOME REPLICATION STRATEGY AND UNIQUE GENOMIC 187 FEATURES

188 The four representative genomes (TOSV/OS3173, TGBSV, AJCSV, ACSV) ranged from 37,256  
189 bp to 41,208 bp in length, ranged in GC content from 34.0% to 37.1%, and encoded 48 to 53 open reading  
190 frames, with coding fraction ranging from 94.5% to 96.5% (Table 2, annotations found in supplemental  
191 File S2). The TOSV/OS3173 contig assembled into a circular genome, whereas the other genomes could  
192 not be circularized (Table 3) possibly due to lower coverage or incomplete assembly owing to population  
193 heterogeneity (Figure S2). For now, it is uncertain whether the genome is packaged as a circular molecule  
194 or whether it is packaged as a circularly permuted linear genome that circularizes only in the bacterial host.  
195 For all genomes, the transcriptional orientation of the ORFs is generally divided into a 23-26 kb set of  
196 contiguous genes on the same strand (clockwise in Figure 1), encoding 32-37 genes, and a smaller block  
197 on the other strand (counterclockwise in Figure 1), encoding 13-18 genes. As with most viral genomes,  
198 most genes are located in large blocks on the same strand. In each genome there are two to four instances  
199 of changes of strand involving one to two genes, except TGBSV, which consists exclusively of two large  
200 gene blocks, one on each strand. In the ACSV genome, there are two instances of a change of strand, each  
201 consisting of two genes. In each genome, a small (750 to 1,350 bp) intergenic region separated the sets of  
202 divergently transcribed genes, and this intergenic region also marked a strong divergence in GC skew.  
203 These features suggest bidirectional DNA replication beginning in the intergenic region around 36,429 bp  
204 of TOSV and the corresponding regions of the other viral genomes. These intergenic regions also contained  
205 repetitive elements predicted to form stem-loop structures, consistent with secondary structure typical of  
206 origins of replication. Many bacterial genomes are replicated bidirectionally, and their genomes have a  
207 G>C bias in the leading strand of replication and a C>G bias in the lagging strand (Képès et al., 2012);

208 however, dsDNA phage do not typically replicate bidirectionally (Weigel and Seitz, 2006), and in this  
209 regard we suggest these viral genomes replicate more like mini bacterial genomes than typical phage  
210 genomes. Cultivation of one of the viruses would be necessary to test this hypothesis.

211 The presence of polymerase-, nuclease/recombinase-, and helicase-annotated genes in the smaller,  
212 counterclockwise set of genes in all four genomes suggests these genes might be transcribed earlier than  
213 the mainly structural genes in the larger, clockwise-facing block (Figure 1; Table S1, File S2). However,  
214 some genes encoding proteins associated with nucleotide metabolism were located among the clockwise-  
215 facing genes, including a DNA Pol III beta subunit (sliding clamp) in TOSV; a thymidylate kinase in TOSV,  
216 TGBSV, and AJCSV; and several genes that were found in only one of the four genomes, including site-  
217 specific DNA methylase (AJCSV), ribonucleotide reductase beta subunit (AJCSV), ATPase/kinase  
218 (AJCSV), and methyltransferases (ACSV). The location of these genes among the clockwise-facing part of  
219 the genomes and variability of these genes among the four UViGs suggest a variable and complex  
220 transcriptional/replication lifecycle for these viruses, or alternatively, that some nucleotide modification  
221 may be required during the lytic phase of infection.

222 Several genes encoding enzymes putatively involved in nucleic acid metabolism or DNA  
223 replication bear similarity to those in other viruses. ORF 3 of TOSV encodes a 119-amino acid protein with  
224 some similarity to a *Sulfolobus* virus DNA-binding protein that is highly conserved in diverse crenarchaeal  
225 viruses (Larson et al., 2007; Keller et al., 2007). TOSV and TGBSV both encode a putative sliding clamp  
226 beta subunit of DNA polymerase III, but they both lack an obvious clamp loader. Whether the viral replicase  
227 uses the host clamp loader or encodes an unrecognized clamp loader is unknown. Other viruses, including  
228 bacteriophage T4, encode sliding clamps, which have been shown to greatly increase processivity and the  
229 rate of replication (Trakselis et al., 2001). TOSV, TGBSV, and AJCSV each encode putative thymidylate  
230 kinases. Thymidylate kinases are encoded by a variety of viruses, including T4 and herpes simplex type 1  
231 viruses. They are part of the nucleotide salvage pathway, typically have broad substrate activity, and are  
232 popular targets for antiviral drugs as they are often required for viability (Xie et al., 2019). ORF 5 in AJCSV  
233 encodes a putative site-specific DNA methylase. Viral genome methylation is a common epigenetic defense  
234 against host restriction-modification systems. Two putative methyltransferases of unknown activity are  
235 encoded by ORF 41 and ORF 42 of ACSV.

236 The counterclockwise-oriented genes included three major replicase-associated proteins that were  
237 conserved in all four UViGs: an ATP-dependent helicase (ORF 38 in TOSV), a nuclease/recombinase (ORF  
238 37 in TOSV), and a large polyprotein encoding a Pol A with functionally active polymerase activity  
239 (OS3173 Pol) (ORF 36 in TOSV). The helicase genes contain two P-loop-containing nucleoside  
240 triphosphate hydrolase domains related to the DEAD-like helicase superfamily, but the similarity to  
241 functionally characterized orthologs is low. The Cas4-RecB-like nuclease (ORF 37 in OS3173) belongs to



242 the PD-(D/E)XK nuclease superfamily, and may function as a single-stranded DNA-specific nuclease  
243 during replication and/or recombination, as these functions have been demonstrated for similar enzymes  
244 encoded by thermophilic archaeal viruses (Gardner et al., 2011; Guo et al., 2015).

245 ORF 36 in TOSV encodes a 1,606-amino acid polyprotein (OS3173 Pol), which was used to  
246 identify this group of viruses in the metagenomes (Figure 2). The amino-terminal region has conserved  
247 motifs that suggest primase and/or helicase function, including DUF927 (conserved domain with carboxy  
248 terminal P-loop NTPase) and COG5519 (Superfamily II helicases associated with DNA replication,  
249 recombination, and repair (Marchler-Bauer et al., 2011)). Consensus Walker A and Walker B motifs  
250 suggest NTP binding and hydrolysis likely associated with helicase activity (Walker et al., 1982). As  
251 reported previously (Schoenfeld et al., 2013), the viral *polA* genes are similar to the single genomic *polA*  
252 of *Aquificaceae* and *Hydrogenothermaceae*, as well as genes found as additional *polA* copies in a variety  
253 of other bacterial genomes, and to the nuclear-encoded, apicoplast-targeted DNA polymerases of several  
254 *Apicomplexa* species, typified by the Pfpex protein of *Plasmodium falciparum*. That enzyme is optimally  
255 active at 75°C (Seow et al., 2005), much higher than would be encountered during the *Plasmodium* life  
256 cycle, but similar to the optimal growth temperature of *Thermocrinis* and the geothermal springs sampled  
257 in this study, implying lateral gene transfer (Schoenfeld et al., 2013). Understanding the biochemical  
258 functions of the rest of the ORF 36 domains could reveal new thermostable accessory proteins for DNA  
259 amplification.

260 Most of the clockwise-facing genes that were annotated suggest these UViGs represent dsDNA  
261 tailed viruses belonging to the *Caudovirales*. Independent evidence that these viruses have dsDNA genomes  
262 comes from the initial study reporting the OS3173 PolA (Schoenfeld et al., 2008), because the viral DNA  
263 was amplified using a linker-dependent method that is specific for dsDNA. Furthermore, TOSV ORF 25,  
264 along with corresponding genes in the other UViGs, was annotated as a terminase large subunit, and ORF  
265 24 was inferred to be a terminase small subunit, based on location immediately upstream of the large  
266 terminase, gene length (~300-400 bp), and a similar isoelectric point as other terminases. The terminase  
267 small subunit protein is a site-specific endonuclease that hydrolyzes viral DNA in preparation for packaging  
268 and encapsulation by the terminase large subunit (Kala et al., 2014). Terminase large subunit phylogeny  
269 has previously been used to infer the mechanism of packaging (Merrill et al., 2016, Chelikani et al., 2014);  
270 however, the terminases from this group of viruses was distant from those of well-studied viruses, so the  
271 mechanism of packaging could not be inferred (Figure S8). Immediately downstream of the putative  
272 terminase subunits in all genomes are two putative phage capsid proteins at ORF 26 and ORF 27 in TOSV.  
273 ORF 16 in TOSV was annotated as a portal protein, which forms dodecameric rings that play critical roles  
274 in virion assembly, DNA packaging, and DNA injection in *Caudovirales* (Prevelige and Cortines 2018).  
275 Additionally, TGBSV encodes a putative prohead protease (ORF 1), a WAIG tail domain protein (ORF 3),

276 and a T7 tail fiber protein homolog (ORF 5), further supporting a relationship to *Caudovirales* and  
277 suggesting it encodes tail fibers typical of many *Caudovirales*. ORF 15 in TOSV was annotated as a lytic  
278 transglycosylase (lysin) based on the presence of a lysozyme-like domain. ORF 14 in TOSV was annotated  
279 as a holin based on the presence of three transmembrane domains, its small size (270 bp), and its location  
280 immediately upstream of ORF15. Also, the overlapping of open reading frames between ORFs 13, 14, and  
281 15, suggests an anti-holin, holin, lysin operon, as found in numerous viruses. Together, these enzymes form  
282 the lysis cassette, which is common in *Caudovirales*, but not well understood in viruses of *Archaea*  
283 (Prangishvili 2013; Saier and Reddy 2015). There were also no lysogeny-related genes (e.g., integrases,  
284 excisionases or Cro/CI genes (Lima-Mendez et al., 2011, Shao et al., 2017) identified from these UViGs,  
285 suggesting a purely lytic lifestyle. As most of the clockwise-facing genes appear to be involved in viral  
286 packaging and lysis, these genes are predicted to be transcribed later than the counterclockwise-facing  
287 genes, as the lysis cassette is typically the last to be transcribed (Labrie et al., 2004, Young, 2014).

288 Each of the UViGs encode numerous hypothetical genes with no predicted function (~70%;  
289 including hits to known hypothetical proteins as well as those with no homology to known proteins), as is  
290 common in bacterial and archaeal viruses. Several of these were conserved among the genomes, but others  
291 were unique to each genome, or have diverged sufficiently that primary sequence conservation is difficult  
292 to discern. Many of the hypothetical proteins are related to genes found in different members of the  
293 *Aquificae*, consistent with the previous hypothesis that *Thermocrinis* and possibly other *Aquificae* are the  
294 putative hosts for these viruses.

295

#### 296 PUTATIVE HOSTS BELONG TO THE AQUIFICAE

297 Arrays of Clustered Regularly Interspaced Palindromic Repeats (CRISPRs) and related Cas  
298 (CRISPR associated) genes found in many bacterial and archaeal genomes (Grissa et al., 2007) provide a  
299 means to infer virus-host relationships (Gudbergsdóttir et al., 2016; Heidleberg et al., 2009; Snyder et al.,  
300 2010; Anderson et al., 2011; Roux et al., 2019a), as the CRISPR spacers provide a record of foreign nucleic  
301 acids that have been targeted by the CRISPR-Cas system. To determine the potential host range of these  
302 UViGs, genomes derived from isolates of *Hydrogenobaculum* sp. 3684, *Sulfurihydrogenibium*  
303 *yellowstonense* SS-5<sup>T</sup>, *Thermocrinis ruber* OC1/4<sup>T</sup>, and *Thermocrinis jamiesonii* GBS1<sup>T</sup> were screened for  
304 CRISPR arrays with spacers matching the UViGs. *Hydrogenobaculum* sp. 3684 had six robust CRISPR  
305 clusters predicted, with the number of CRISPR spacers ranging between four and 50 in each cluster. In  
306 contrast, 19 CRISPR clusters were predicted for *Sulfurihydrogenibium yellowstonense* SS-5<sup>T</sup>, with the  
307 smallest having four spacer regions and the largest having 41. *T. ruber* OC1/4<sup>T</sup> and *T. jamiesonii* GBS1<sup>T</sup>  
308 genomes possessed six and four CRISPR clusters, ranging in the number of spacers between eight and 18,  
309 and four and 15, respectively. Each of these host genomes had one or more spacer with significant

310 homology to the TOSV, TGBSV, and AJCSV genomes (Figure 5). No significant spacer matches were  
311 detected for ACSV. The six CRISPR spacer matches of the *T. ruber* OC1/4<sup>T</sup> genome were somewhat distant  
312 (80-95% nucleic acid identity), which is reasonable considering that this organism was isolated from  
313 samples collected from Octopus Spring in 1994 (Huber et al., 1998), and the samples from which the UViGs  
314 were assembled were collected between 2007 and 2012. Furthermore, metagenomic studies of the pink  
315 streamer community in Octopus Spring revealed three dominant *Thermocrinis* populations, but each was  
316 distinct from *T. ruber* OC1/4<sup>T</sup> (Takacs-Vesbach et al., 2013); thus, it is possible that the *T. ruber* OC1/4<sup>T</sup>  
317 genotype is rarely encountered by TOSV. To assess this possibility, we analyzed *Thermocrinis*  
318 metagenome-assembled genomes (MAGs), as well as other MAGs from the *Aquificae*, from Octopus  
319 Spring (and other) metagenomes; however, the CRISPR arrays typically did not assemble with the  
320 respective MAGs, presumably because of non-native nucleotide word frequency associated with the  
321 foreign-derived CRISPR spacers (data not shown). Similarly, CRISPR spacer matches to the  
322 *Hydrogenobaculum* sp. 3684 and *Sulfurihydrogenibium yellowstonense* SS-5<sup>T</sup> genomes were also distant  
323 (81-92%). By comparison, *T. jamiesonii* GBS1<sup>T</sup>, contained three arrays with four CRISPR spacers in total  
324 with significant identity to the TGBSV genome (>95%; ranging between 0 and 1 mismatch) (Figure 5B),  
325 providing strong evidence of the virus-host relationship.

326 The CRISPR spacers mapped to several different genes in the TOSV, TGBSV, and AJCSV  
327 genomes; however, the C-terminus of the PolA was targeted by spacers in each virus, and another two  
328 spacers mapped to the central portion of the PolA gene in TGBSV, suggesting that the C-terminus of the  
329 PolA is a functionally important antiviral target for the host (Figure 5). Accordingly, the C-terminal-  
330 encoding portion of the polA gene was among the most highly conserved regions of the genomes (Figure  
331 3). The large capsid protein gene matched several spacers in TOSV and AJCSV, but not in TGBSV. The  
332 large terminase gene in AJCSV had matches to multiple CRISPR spacers, although this was not observed  
333 in the other two UViGs.

334 *Thermocrinis* is the dominant member of the pink streamer community in Octopus Spring  
335 (Reysenbach et al., 1994; Takacs-Vesbach et al., 2013) and the planktonic community in GBS (Cole et al.,  
336 2013); thus, it is reasonable to hypothesize that the natural host for the dominant viruses in these springs is  
337 *Thermocrinis*, as supported by shared gene content and CRISPR spacer matches. *Thermocrinis* is also  
338 extremely abundant in Little Hot Creek (Vick et al., 2010). Thus, we suggest that virus Groups 1 and 2, all  
339 encoding the larger polyprotein (Figure 2), associate with *Thermocrinis* as their putative host. These viruses  
340 are typified by TOSV (OS3173) and TGBSV, with the complete UViG of TOSV serving as the reference  
341 species for the group.

342 In contrast, *Sulfurihydrogenibium* was the dominant microorganism in Calcite Spring (Reysenbach  
343 et al., 2000) and Joseph's Coat Spring was dominated by Archaea (Inskeep et al., 2013). We suggest that

344 *Sulfurihydrogenibium* and/or *Hydrogenobaculum* are the most likely hosts for Group 3 and Group 4 viruses,  
345 especially as multiple hits were obtained to both these potential hosts with the AJCSV UViG.  
346 *Hydrogenobaculum* forms a distinct clade from *Thermocrinis*, *Hydrogenobacter*, *Aquifex*, and  
347 *Hydrogenivirga* within the *Aquificaceae*, and predominates in low pH springs (pH < 4.0) (Inskeep et al.,  
348 2013; Takacs-Vesbach et al., 2013). *Sulfurihydrogenibium* belongs to the sister family,  
349 *Hydrogenothermaceae*, and predominates in circumneutral springs (pH 6.5-7.8) (Takacs-Vesbach et al.,  
350 2013) and grows in a wide pH range in the lab (pH 5.0-8.8) (O'Neill et al., 2008). In this regard, it is  
351 noteworthy that some geothermal springs are poorly buffered and can change from circumneutral to highly  
352 acidic in both space and time, depending on the amounts and sources of geothermal and meteoric water that  
353 pool, and particularly on the source of sulfide, which can be oxidized to sulfuric acid by sulfide-oxidizing  
354 microorganisms (Nordstrom et al., 2009). Thus, it is possible that Group 3 and/or Group 4 viruses encounter  
355 and infect *Sulfurihydrogenibium* in circumneutral regions of the springs and *Hydrogenobaculum* in highly  
356 acidic regions, explaining the nearly equal numbers of CRISPR spacer matches to each organism.  
357 Additionally, the gene-sharing network and a neighbor-joining tree based on amino acid identity both  
358 suggested a distant relationship to *Hydrogenobaculum* phage 1 (Figure 3A,B, S3) (Gudbergsdóttir et al.,  
359 2016), a 19,351 bp UViG recovered from a metagenome from Grensdalur, Iceland that was assigned to  
360 *Hydrogenobaculum* based on CRISPR spacer matches to genomes from cultivated *Hydrogenobaculum*  
361 strains. Since the exact hosts of the Group 3 and Group 4 viruses are not conclusive, we suggest the names  
362 *Aquificae* Joseph's Coat Virus (AJCV, high-quality draft genome) and *Aquificae* Conch Spring Virus  
363 (ACSV, high-quality draft genome) to represent the best genomes of Group 3 and Group 4.

364

#### 365 DESCRIPTION OF PROPOSED VIRUSES

366 (Py.ro.vi'rus. Gr. n. *pur*, fire; N.L. neut. n. Pyrovirus, "fire virus", a thermophilic virus).

367 Based on the data presented here, we propose the following names and taxonomic relationships.  
368 Multiple genomic features suggest the nine novel UViGs belong to the order *Caudovirales*. The low overall  
369 sequence similarity and distinct placement of these taxa in gene-sharing networks suggest these viruses  
370 belong to an unclassified viral family and represent one putative genus-level group.

371 The proposed genus Pyrovirus accommodates TOSV (OS317), TGBSV, AJCV, and ACSV, with  
372 the complete genome of TOSV serving as the reference species for the genus. Members of this genus are  
373 predicted to infect *Aquificae* and are abundant in terrestrial geothermal springs. The estimated size of  
374 genomes in this genus range from 37 kb to 42 kb. The genomes contain genes encoding a thymidylate  
375 kinase, a holin, a lytic transglycosylase, a portal protein, large and small terminases, phage capsid proteins,  
376 DNA polymerase A (with fused or unfused DUF927 helicase domain), a nuclease and a helicase. Members  
377 of this genus are proposed to employ a complex bidirectional replication strategy.

378

## 379 MATERIALS AND METHODS

### 380 ISOLATION OF UNCULTURED VIRAL PARTICLES FROM OCTOPUS HOT SPRING AND GREAT 381 BOILING SPRING

382 Virus particles were isolated from Octopus Hot Spring in Yellowstone National Park (Permit #  
383 YELL-2007-SCI-5240), Wyoming (N 44.5342, W 110.79812) in 2007 and from Great Boiling Spring  
384 (GBS), Nevada, (N 44.6614, W 119.36622) in October 2010, respectively. Temperature at the time and  
385 location of sampling was 87 °C at the outflow channel of Octopus Spring and 85 °C in the source pool of  
386 Great Boiling Spring.

387 For Octopus Spring samples, thermal water (between 200 and 630 liters) was filtered using a 100  
388 kDa molecular weight cut-off (mwco) tangential flow filter (A/G Technology, Amersham Biosciences, GE  
389 Healthcare) and viruses and cells were concentrated to about 2 liters. The resulting concentrates were  
390 filtered through a 0.2 µm tangential flow filter to remove microbial cells. The viral fractions were further  
391 concentrated to about 100 mL using a 100 kDa tangential flow filter and 40 mL of viruses were further  
392 concentrated to 400 µL and transferred to SM buffer (0.1 M NaCl, 8 mM MgSO<sub>4</sub>, 50 mM Tris HCl, pH  
393 7.5) by filtration in a 30 kDa mwco spin filter (Centricon, Millipore).

394 For the GBS viral sample tangential-flow filtration using a 30 kDa molecular weight cutoff  
395 Millipore Prep/Scale TFF-6 filter (catalog # CDUF006TT) was used to concentrate ~500 L of GBS water  
396 to ~2 L. Filtration was done in December 2010 with water from the GBS “A” site (Cole et al., 2013) with  
397 a temperature of 80-83 °C and pH of 7.15-7.2. The concentrated sample was stored on ice and transported  
398 to the laboratory, where it was pelleted by centrifugation at 4 °C for 10 minutes at 10,000 x g.

399

### 400 ISOLATION OF VIRAL AND PLANKTONIC CELL DNA

401 *Serratia marcescens* endonuclease (Sigma, 10 U) was added to both viral preparations described  
402 above to remove non-encapsidated (non-viral) DNA. The reactions were incubated at 23°C for between 2  
403 hours. EDTA (20 mM), sodium dodecyl sulfate (SDS) (0.5%) and Proteinase K (100 U) were added and  
404 the reactions were incubated at 56°C. Subsequently, sodium chloride (0.7M) and cetyltrimethylammonium  
405 bromide (CTAB) (1%) were added. The DNA was then extracted with chloroform, precipitated with  
406 isopropanol and washed with 70% ethanol. Yields of DNA ranged from 20 to 200 ng.

407 For preparation of cellular DNA from GBS, high molecular weight DNA was extracted from the  
408 pelleted cells essentially using the JGI bacterial DNA isolation CTAB protocol ([https://jgi.doe.gov/user-  
409 programs/pmo-overview/protocols-sample-preparation-information/jgi-bacterial-dna-isolation-ctab-  
410 protocol-2012/](https://jgi.doe.gov/user-programs/pmo-overview/protocols-sample-preparation-information/jgi-bacterial-dna-isolation-ctab-protocol-2012/)). Briefly, this involved cell lysis with lysozyme (2.6 mg/mL), proteinase K (0.1 mg/mL),  
411 and SDS (0.5%), followed by purification of DNA by incubation with CTAB (1%) and sodium chloride



412 (0.5 M), organic extraction, alcohol precipitation, treatment with RNase A (0.1 mg/mL), and an additional  
413 alcohol precipitation step.

414

#### 415 WHOLE-GENOME AMPLIFICATION OF VIRAL METAGENOMIC DNA

416 For the viral library that contained sequences of TOSV, a linker-based amplification method was  
417 used as described (Schoenfeld et al., 2008). For subsequent viral preparation isolated viral metagenomic  
418 DNA was amplified with an Illustra GenomiPhi V2 DNA amplification kit (G.E. Healthcare, Piscataway,  
419 NJ) following manufacturer's protocol. Briefly, 9  $\mu$ L sample buffer and 1  $\mu$ L sample DNA were mixed  
420 and incubated at 95°C for 3 minutes and then placed on ice. Nine  $\mu$ L reaction buffer and 1  $\mu$ L enzyme were  
421 then mixed and combined with the 10  $\mu$ L sample and incubated for 2 hours at 30°C and 10 minutes at 65°C.  
422 The amplified DNA was then precipitated with NaCl and ethyl alcohol and resuspended in 40  $\mu$ L water.  
423 The amplified DNA was debranched by adding 10  $\mu$ L of 5X S1 nuclease buffer and 2  $\mu$ L S1 nuclease (200  
424 U; Thermo Fisher Scientific Inc., Waltham, MA), mixed and incubated at 25°C for 30 minutes and then  
425 70°C for 10 minutes. The sample was reprecipitated twice with NaCl and ethyl alcohol and resuspended  
426 in 20  $\mu$ L water. Several amplification reactions were prepared and used for DNA sequence analysis and to  
427 construct a large insert library in order to capture regions of the viral replisome.

428

#### 429 METAGENOMIC SEQUENCING AND ASSEMBLY

430 The amplified Octopus Spring viral metagenomic DNA was sequenced using Roche 454 chemistry  
431 at the Broad Institute (229,553 reads averaging 375 nucleotides each; 86,161,605 bases in total). The full  
432 read set was assembled *de novo* with CLC Genomics Workbench 8.0, using word size of 20 and bubble  
433 size of 375. A total of 5,143 contigs of length >500 were assembled with N50 = 1,818 bp, average length  
434 of 1,586 bp, maximum contig length of 35,614 bp (contig\_4), and total assembly length of 8,156,404 bp.  
435 Of the 229,553 original reads, 66% (152,673 reads) were incorporated into contig assemblies >500 bp.  
436 Of the reads, 56.6% (86,379 reads) mapped to the largest contig (contig\_4) at a stringency of 90%, which  
437 eventually was closed as Octopus Spring OS3173 virus (TOSV), resulting in an average coverage of 907-  
438 fold. The TOSV consensus viral sequence was finished by an iterative process of extending the ends of  
439 contig\_4 with partially mapped reads until the extended consensus ends were found to overlap. This resulted  
440 in a 37,256 bp circular genome. A total of 99,924 reads were mapped to the finished genome (also at 90%  
441 stringency), and reads were found to map continuously across the joined overlap, consistent with a circular  
442 topology. Reads that did not map at 90% stringency were saved and remapped at relaxed stringency (80%  
443 identity over 80% length). These relaxed stringency reads were found to contain structural variants. The  
444 origin of the reported viral sequence was arbitrarily set to the beginning of the first ORF clockwise of the  
445 negative to positive GC skew transition (Figure 1). Viral contigs with lower coverage from the virus-



446 enriched metagenome were obtained by reassembling the same reads using SPAdes v. 3.13.1 (Bankevich  
447 et al., 2012) with default parameters, except for the option “--only-assembler”.

448 Both cellular and amplified viral metagenomes from GBS were sequenced at the DOE Joint  
449 Genome Institute using Roche 454 GS FLX Titanium chemistry. Double-stranded genomic DNA samples  
450 were fragmented via sonication to fragments ranging between approximately 400 and 800 bp. These  
451 fragments were end-polished and ligated to Y-shape adaptors during 454 Rapid Library Construction.  
452 Clonal amplification of the library fragments was then performed in bulk through hybridization of the  
453 fragments to microparticle beads and subsequent emulsion-based PCR. Beads containing amplified DNA  
454 fragments were loaded into wells of a Pico Titer Plate (PTP) so that each well contained a single bead,  
455 followed by sequentially flowing sequencing reagents over the PTP. For the water-borne cell metagenome,  
456 a total of 355,082 reads were obtained ranging in length from 56 - 2,049 nucleotides producing 196,771,207  
457 bases in total. During preprocessing through the DOE-JGI Metagenome Annotation Pipeline (MAP;  
458 <https://img.jgi.doe.gov/m/doc/MetagenomeAnnotationSOP.pdf>), 454 reads shorter than 150 bp and longer  
459 than 1,000 bp were removed. These reads were assembled with SPAdes v 3.6.1 (Bankevich et al., 2012), to  
460 a total of 315,164 contigs or sequences resulting in a total assembled size of 131,296,876 bases. Gene  
461 calling on the assembled sequences were done through the DOE-JGI MAP, resulting in the prediction of  
462 271,395 RNA genes and 57,654 protein-coding genes. Through this pipeline, CRISPR array prediction was  
463 also done and a total of 508 CRISPR arrays were predicted to be present in the GBS cell metagenome. After  
464 binning with the DOE-JGI binning pipeline, a single *Thermocrinis jamiesonii* MAG was recovered. For the  
465 amplified viral metagenome or GBS virus-enriched metagenome, a total of 787,720 reads were sequenced  
466 ranging between 53 and 1,200 nucleotides for a total read library size of 392,631,172 bases. Read processing  
467 and assembly was also performed through the DOE-JGI MAP, in the same manner as the cellular  
468 metagenome. The virus-enriched metagenome had a total assembled size of 27,375,388 bases, which was  
469 divided over 55,185 contigs. In contrast to the cellular metagenome, only 137 RNA genes were predicted  
470 for this metagenome, supporting a low level of cellular contamination, and 74,087 protein-coding genes  
471 were predicted. A total of 60 CRISPR arrays were predicted.

472

## 473 FUNCTIONAL ANNOTATION

474 ORFs in TOSV were identified by the GeneMarkS heuristic algorithm (Besemer et al., 2001). Open  
475 reading frames identified by GeneMarkS were submitted to NCBI BlastP (Altschul et al., 1990) using  
476 default settings for comparison with proteins in the public database.

477 Putative protein functions were inferred from searches against the NCBI nonredundant (nr) protein  
478 database with BLASTP (<http://blast.ncbi.nlm.nih.gov>), NCBI Conserved Domain Database (CDD)  
479 (<http://ncbi.nlm.nih.gov/Structure/cdd>) with CD-Search , UniProtKB with HMMer (<http://hmmer.org>), and

480 CDD, Protein Data Bank (PDB), SCOPe 70 and Pfam with HHPred  
481 (<https://toolkit.tuebingen.mpg.de/tools/hhpred>). An E-value cutoff of  $1e^{-10}$  was used for all tools. For each  
482 tool, the result with the lowest E-value that was not a “hypothetical protein” was chosen as the putative  
483 function predicted by that tool (Stamereilers et al., 2018). In some instances, putative function was assigned  
484 by synteny based on location and gene length (e.g., small terminase, holin).

485 In order to compile a composite annotation for all four of the UViGs used as representatives of the  
486 four PolA groups (i.e. Pyrovirus), all manual annotations were combined with functional annotations  
487 determined via the DOE-JGI MAP. Bidirectional BLASTp (Altschul et al., 1990) analyses were performed  
488 between all four viral sequences. Genes that were bidirectional best hits were considered homologous and  
489 robust annotations (separately identified as having the same function in at least two of the four UViGs)  
490 were transferred to all homologs. Where homologous genes had no functional annotation, or contradicting  
491 annotations between the reference sequences, the respective genes were denoted as encoding conserved  
492 hypothetical proteins.

493

#### 494 SINGLE-GENE TREES

495 In order to place the viral sequences identified to be close relatives of TOSV into phylogenetic  
496 context, two single-gene phylogenetic analyses were conducted on the protein sequences of firstly, the PolA  
497 from all viral scaffolds, together with the 3173 PolA-like sequences from Schoenfeld et al. (2013), and  
498 secondly, the large terminase subunit sequence. For the PolA phylogeny, the 3173 PolA-like sequences of  
499 *Thermocrinis* species were used for outgroup purposes based on previous studies (Schoenfeld et al., 2013).  
500 In contrast, the terminase phylogeny was unrooted, and reference sequences of Chelikani et al., (2014) were  
501 used to infer the potential packaging strategy of these viruses. Due to the variability present in these viral  
502 genes, the protein sequences were aligned based on structurally homologous protein domains with DASH  
503 (Rozewicki et al., 2019) in MAFFT v. 7 (Kato et al., 2017; <https://mafft.cbrc.jp/alignment/server/>), with  
504 default settings. The appropriate protein model of evolution was determined for the respective alignments  
505 with ProtTest 3.4 (Darriba et al., 2011) and maximum likelihood analyses were conducted with RaxML v.  
506 8.20 (Stamatakis, 2014). Branch support for the phylogenies was inferred from 1,000 bootstrap  
507 pseudoreplicates.

508

#### 509 PREDICTION OF PROTEIN DOMAINS

510 For the prediction of protein domains from the 3173 PolA-like sequences, a search of domain profiles based  
511 on hidden Markov Models was conducted through the EMBL-EBI hmmsearch tool  
512 (<https://www.ebi.ac.uk/Tools/hmmer/search/hmmsearch>) against the pfam database (El-Gebali et al.,  
513 2019). Protein family domains were predicted for all 3173 PolA-like protein sequences used in this study

514 to determine whether the DUF 927 helicase and DNA pol A exo domains are fused to the pol A domain of  
515 the 3173 PolA-like proteins. Transmembrane domains for putative holins present in the four representative  
516 genomes from the proposed genus Pyrovirus were predicted through the TMHMM server  
517 (<http://www.cbs.dtu.dk/services/TMHMM/>).

518

#### 519 GENOME MAPS

520 Genome maps for the four reference sequences were constructed with CGView (Grant and  
521 Stothard, 2008; [http://stothard.afns.ualberta.ca/cgview\\_server/](http://stothard.afns.ualberta.ca/cgview_server/)). The GC content and skew for each genome  
522 was calculated with a step size of 1bp using a sliding window of 500bp. Protein-coding sequences were  
523 colored based on the homology inferences from the synteny analyses and the composite annotations for  
524 each genome. Breaks in the UViG sequences that were not circularized, i.e. TGBSV, AJCSV and ACSV,  
525 were indicated with red lines in all three tracks of the maps. The genome maps were rotated to align with  
526 that of TOSV for easier visualization.

527

#### 528 RELATIVE ABUNDANCE OF VIRAL CONTIGS IN VIROMES

529 From the metagenomes analyzed, viral genomes were predicted with VirSorter v. 1.0.5 (Roux et  
530 al., 2015), Earth's Virome pipeline (Paez-Espino et al., 2016) and Inovirus detector pipeline v. 1.0  
531 (<https://bitbucket.org/srouxjgi/inovirus/src/master/>) (Roux et al., 2019b). From the respective viral-  
532 enriched metagenomes, 372 contigs were obtained with 42 contigs  $\geq 10,000$  bp. Dereplication was done  
533 with an Average Nucleotide Identity (ANI) of 95% over an alignment fraction of 85% to obtain 320 non-  
534 redundant contigs. Contig coverage was estimated by mapping reads from individual metagenomes to the  
535 320 non-redundant viral contigs using BMap v. 38.67 (<https://www.osti.gov/biblio/1241166-bbmap-fast-accurate-splice-aware-aligner>). Only reads that mapped at  $\geq 95\%$  nucleotide identity were considered and  
537 contig coverage was set at 0 if less than 70% of the contig's length was covered by metagenomic reads, or  
538 as the average read depth per position otherwise, as typical for UViG analysis (Roux et al., 2019a).

539

#### 540 VIRAL CLASSIFICATION

541 All contigs  $\geq 10,000$  bp obtained from the virus-enriched metagenomes, together with the four  
542 representative UViGs were used as input with the viral reference sequence database (RefSeq v94), to  
543 automatically delineate genus-level groups based on shared gene content in vContact2 using default  
544 parameters (Bin Jang et al., 2019). The resulting gene-sharing network was viewed and edited in Cytoscape  
545 3.7.2 (<http://cytoscape.org>), using a prefuse force directed layout.

546

#### 547 PROTEOMIC TREE AND SYNTENY ANALYSES

548 In order to confirm the relationships among the nine UViGs, a proteomic tree was constructed with ViPtree  
549 (Nishimura et al., 2017; <https://www.genome.jp/viptree/>). This Neighbor-Joining (NJ) tree is constructed  
550 by computing genome-wide tBLASTx similarity scores (McGinnis and Madden, 2004) among all  
551 submitted and all reference viral sequences. These similarity scores were then used to construct a distance  
552 matrix used for constructing a BIONJ tree. Based on previous results, the nucleic acid type was specified  
553 as dsDNA, with prokaryotes indicated as the potential hosts. Gene predictions as performed above were  
554 used for the UViGs. This process was repeated for the 10 UViGs with the highest coverage in the two virus-  
555 enriched metagenomes (i.e. from Octopus Spring and Great Boiling Spring). For depicting synteny, the  
556 genome alignments based on tBLASTx analyses, as inferred with ViPtree, was used.

557

#### 558 HOST IDENTIFICATION FOR ABUNDANT VIRUSES IN GREAT BOILING SPRING AND 559 OCTOPUS SPRING

560 The ten viruses with the highest coverage in Great Boiling Spring and Octopus Spring respectively,  
561 were identified from the viral metagenomes. In order to identify potential hosts for these viruses, a two-  
562 pronged approach was employed. The first approach consisted of identifying potential prophages in  
563 bacterial and archaeal genomes, while the second approach consisted of identifying CRISPR spacers in host  
564 genomes matching the viral sequences.

565 For the identification of potential prophages matching the viral sequences, BLASTn analyses were  
566 conducted with the 10 viruses with the highest coverage in each spring to the DOE JGI/IMG isolate genome  
567 database (Chen et al., 2019), as well as the NCBI Whole Genome Shotgun (WGS) and RefSeq Genomic  
568 (refseq\_genomic) databases.

569 For the second approach, CRISPR clusters were used from all metagenomes, SAGs and isolate  
570 genomes, available on IMG for Octopus Spring and Great Boiling Spring. All CRISPR spacer regions  
571 available on IMG for these genomes were used for further analysis. Those single-amplified genomes and  
572 isolate genomes that did not have CRISPR prediction results available on IMG were analyzed with  
573 CRISPRCasFinder (<https://crisprcas.i2bc.paris-saclay.fr/CrisprCasFinder/Index>; Couvin et al., 2018). All  
574 predicted spacer regions were then compared to the ten most covered virus sequences in each spring using  
575 BLASTn (BLAST v.2.2.31; Altschul et al., 1990) with custom settings (-word\_size 7 -gapopen 10 -  
576 gapextend 2 -penalty -1 -outfmt 6 -dust no). For the spacer comparisons from the metagenomes, only spacer  
577 regions with matches over 100% of the length of the spacer were considered, while matches over 80% of  
578 the length of the spacers were considered for SAGs and isolate genomes. Resulting BLAST hits were then  
579 further limited to those with a percentage identity of  $\geq 80\%$  and an Expect(e)-value of  $\leq 0.00001$ .

580 For the CRISPR spacer detection of the four representative UViGs to *Hydrogenobaculum* sp. 3684,  
581 *Sulfurihydrogenibium yellowstonense* SS-5<sup>T</sup>, *Thermocrinis ruber* OC1/4<sup>T</sup>, and *Thermocrinis jamiesonii*

582 GBS1<sup>T</sup>, these microbial isolate genomes were subjected to CRISPR array prediction with  
583 CRISPRCasFinder. The resulting CRISPR arrays with a confidence level of three or above were further  
584 analyzed. All predicted spacer sequences were subjected to BLASTn analyses against TOSV, TGBSV,  
585 AJCSV and ACSV as described above.

586

## 587 RECRUITMENT PLOTS

588 To visualize the level of variability within the viral populations and coverage across the UViGs for  
589 Octopus Spring and Great Boiling Spring, raw sequence reads were recruited to the UViGs of TOSV and  
590 TGBSV. The UViGs were used to construct BLAST databases using makeblastdb in BLAST v. 2.2.31.  
591 Following this, BLASTn analyses were conducted with each UViG database as reference and their  
592 respective metagenomic reads from which they were assembled, as query. Default settings for BLAST  
593 analyses were used apart from specifying tabular format for the data output (-outfmt 6), reporting a single  
594 HSP per subject sequence (-max\_hsps 1) and keeping a single alignment per subject sequence (-  
595 max\_target\_seqs 1). The BLAST results were formatted with BlastTab.catsbj.pl  
596 (<http://enveomics.blogspot.com/2013/01/blasttabcatsbjpl.html>) limiting the identity of hits to report to  
597 30%, and these data was then subjected to recruitment plot construction with enve.recplot2 in the  
598 Enveomics Collection (<https://github.com/lmrodriguezr/enveomics>; Rodriguez-R & Konstantinidis, 2016)  
599 in RStudio v. 3.6.1. To compare obtained recruitment plots to the genomic architecture of the UViGs,  
600 annotated UViGs were visualized with Geneious R7 (Biomatters) and edited in Inkscape v. 0.92.

601

## 602 SEQUENCE ACCESSION NUMBERS

603 The individual sequence reads from the 2007 Octopus hot spring viral sample can be accessed at  
604 <http://data.imicrobe.us/search?query=great+boiling+spring>. The quality-filtered reads is being submitted to  
605 the National Center for Biotechnology Information (NCBI) Sequence Read Archive (SRA). The other  
606 accession numbers for the eight TOSV relatives can be found in the DOE-JGI IMG/M (Chen et al., 2019)  
607 website (<http://img.jgi.doe.gov/m>) under IMG Scaffold ID numbers found in Table 4. The four  
608 representative UViGs (TOSV, TGBSV, AJCV and ACSV) are also being submitted to the NCBI  
609 (<https://www.ncbi.nlm.nih.gov/>) under the nucleotide database.

610

## 611 ACKNOWLEDGEMENTS

612 We thank the Gordon and Betty Moore Foundation for funding the sequence of the viral metagenome from  
613 Octopus Spring, and Matt Henn at the Broad Institute for 454 sequencing. This research was supported by  
614 the United States National Science Foundation grant DEB 1557042, United States Department of Energy  
615 grant DE-EE-0000716, and the Joint Genome Institute at the DOE (CSP-182). The work conducted by the

616 U.S. Department of Energy Joint Genome Institute, a DOE Office of Science User Facility, is supported by  
617 the Office of Science of the U.S. Department of Energy under Contract No. DE-AC02-05CH11231.  
618



619 **REFERENCES**

620

621 Ahn DG, Kim SI, Rhee JK, Kim KP, Pan JG, Oh JW. 2006. TTSV1, a new virus-like particle isolated from  
622 the hyperthermophilic crenarchaeote *Thermoproteus tenax*. *Virology* 351:280-290.

623

624 Altschul SF, Gish W, Miller W, Myers EW, Lipman DJ. 1990. Basic local alignment search tool. *Journal*  
625 *of Molecular Biology* 215(3):403-10.

626

627 Anderson RE, Brazelton WJ, Baross JA. 2011. Using CRISPRs as a metagenomic tool to identify microbial  
628 hosts of a diffuse flow hydrothermal vent viral assemblage. *FEMS Microbiology Ecology* 77(1):120-33.

629

630 Bankevich A, Nurk S, Antipov D, Gurevich AA, Dvorkin M, Kulikov AS, Lesin VM, Nikolenko SI, Pham  
631 S, Prjibelski AD, Pyshkin AV, Sirotkin AV, Vyahhi N, Tesler G, Alekseyev MA, Pevzner PA. 2012.  
632 SPAdes: a new genome assembly algorithm and its applications to single-cell sequencing. *Journal of*  
633 *Computational Biology* 19(5):455-77.

634

635 Besemer J, Lomsadze A, and Borodovsky M. 2001. GeneMarkS: a self-training method for prediction of  
636 gene starts in microbial genomes. Implications for finding sequence motifs in regulatory regions.  
637 *Nucleic Acids Research* 29:2607-2618.

638

639 Bin Jang H, Bolduc B, Zablocki O, Kuhn JH, Roux S, Adriaenssens EM, Brister JR, Kropinski AM,  
640 Krupovic M, Lavigne R, Turner D, Sullivan MB. 2019. Taxonomic assignment of uncultivated prokaryotic  
641 virus genomes is enabled by gene-sharing networks. *Nature Biotechnology* 37(6):632-639.

642

643 Breitbart M, Bonnain C, Malki K, Sawaya NA. 2018. Phage puppet masters of the marine microbial realm.  
644 *Nature Microbiology* 3:754-766.

645

646 Chelikani V, Ranjan T, Kondabagil K. 2014. Revisiting the genome packaging in viruses with lessons from  
647 the "Giants". *Virology*. 466-467:15-26

648

649 Chen IA, Chu K, Palaniappan K, Pillay M, Ratner A, Huang J, Huntemann M, Varghese N, White JR,  
650 Seshadri R, Smirnova T, Kirton E, Jungbluth SP, Woyke T, Eloë-Fadrosh EA, Ivanova NN, Kyrpides NC.  
651 2019. IMG/M v.5.0: an integrated data management and comparative analysis system for microbial  
652 genomes and microbiomes. *Nucleic Acids Research* 47(D1):D666-D677.

653  
654 Cole JK, Peacock JP, Dodsworth JA, Williams AJ, Thompson DB, Dong H, Wu G, Hedlund BP. 2013.  
655 Sediment microbial communities in Great Boiling Spring are controlled by temperature and distinct from  
656 water communities. *ISME Journal* 7:718-729.  
657  
658 Costa KC, Navarro JB, Shock EL, Zhang CL, Soukup D, Hedlund BP. 2009. Microbiology and  
659 geochemistry of Great Boiling and Mud Hot Springs in the United States Great Basin. *Extremophiles* 13:  
660 447-459.  
661  
662 Couvin D, Bernheim A, Toffano-Nioche C, Touchon M, Michalik J, Néron B, Rocha EP, Vergnaud G,  
663 Gautheret D, Pourcel C. 2018. CRISPRCasFinder, an update of CRISRFinder, includes a portable version,  
664 enhanced performance and integrates search for Cas proteins. *Nucleic Acids Research* 46(W1):W246-51.  
665  
666 Darriba D, Taboada GL, Doallo R, Posada D. 2011. ProtTest 3: fast selection of best-fit models of protein  
667 evolution. *Bioinformatics* 27(8):1164-5.  
668  
669 Dodsworth JA, Ong JC, Williams AJ, Dohnalkova AC, Hedlund BP. 2015. *Thermocrinis jamiesonii* sp.  
670 nov., a thiosulfate-oxidizing, autotrophic thermophile isolated from a geothermal spring. *International*  
671 *Journal of Systematic and Evolutionary Microbiology* 65(12):4769-75.  
672  
673 El-Gebali S, Mistry J, Bateman A, Eddy SR, Luciani A, Potter SC, Qureshi M, Richardson LJ, Salazar GA,  
674 Smart A, Sonnhammer ELL, Hirsh L, Paladin L, Piovesan D, Tosatto SCE, Finn RD. 2019. The Pfam  
675 protein families database. *Nucleic Acids Research* 47(D1):D427-D432.  
676  
677 Emerson JB, Roux S, Brum JR, Bolduc B, Woodcroft BJ, Bin Jang H, Singleton CM, Solden LM, Naas  
678 AE, Boyd JA, Hodgkins SB. 2018. Host-linked soil viral ecology along a permafrost thaw gradient. *Nature*  
679 *Microbiology* 3:870-880.  
680  
681 Fuhrman JA. 1999. Marine viruses and their biogeochemical and ecological effects. 1999. *Nature*. 399:541-  
682 548.  
683  
684 Gardner AF, Prangishvili D, Jack WE. 2011. Characterization of *Sulfolobus islandicus* rod-shaped virus 2  
685 gp19, a single-strand specific endonuclease. *Extremophiles* 15: 619-624.  
686

687 Garrett RA, Prangishvili D, Shah SA, Reuter M, Stetter KO, Peng X. 2010. Metagenomic analyses of novel  
688 viruses and plasmids from a cultured environmental sample of hyperthermophilic neutrophiles.  
689 *Environmental Microbiology* 12:2918-2930.  
690

691 Grant JR, Stothard P. 2008. The CGView Server: a comparative genomics tool for circular genomes.  
692 *Nucleic Acids Research* 36:W181-W184.  
693

694 Grissa I, Vergnaud G, Pourcel C. 2007. The CRISPRdb database and tools to display CRISPRs and to  
695 generate dictionaries of spacers and repeats. *BMC Bioinformatics* 8:172.  
696

697 Gudbergsdóttir SR, Menzel P, Krogh A, Young M, Peng X. 2016. Novel viral genomes identified from six  
698 metagenomes reveal wide distribution of archaeal viruses and high viral diversity in terrestrial hot springs.  
699 *Environmental Microbiology* 18(3):863-74.  
700

701 Guo Y, Kragelund BB, White MF, Peng X. 2015. Functional characterization of a conserved archaeal viral  
702 operon revealing single-stranded DNA binding, annealing and nuclease activities. *Journal of Molecular*  
703 *Biology* 427: 2179-2191.  
704

705 Häring M, Peng X, Brügger K, Rachel R, Stetter KO, Garrett RA, Prangishvili D. 2004. Morphology and  
706 genome organization of the virus PSV of the hyperthermophilic archaeal genera *Pyrobaculum* and  
707 *Thermoproteus*: a novel virus family, the *Globuloviridae*. *Virology* 323:233-42.  
708

709 Heller RC, Chung S, Crissy K, Dumas K, Schuster D, Schoenfeld TW. 2019. Engineering of a thermostable  
710 viral polymerase using metagenome-derived diversity for highly sensitive and specific RT-PCR. *Nucleic*  
711 *Acids Research* 47(7):3619-3630.  
712

713 Heidelberg JF, Nelson WC, Schoenfeld T, Bhaya D. 2009. Germ warfare in a microbial mat community:  
714 CRISPRs provide insights into the co-evolution of host and viral genomes. *PLoS One*. 4(1):e4169.  
715

716 Huber R, Eder W, Heldwein S, Wanner G, Huber H, Rachel R, Stetter KO. 1998. *Thermocrinis ruber* gen.  
717 nov., sp. nov., A pink-filament-forming hyperthermophilic bacterium isolated from Yellowstone National  
718 Park. *Applied Environmental Microbiology* 64(10):3576-3583.  
719

720 Inskeep WP, Jay ZJ, Tringe SG, Herrgard M, Rusch DB. 2013. The YNP metagenome project:  
721 environmental parameters responsible for microbial distribution in the Yellowstone geothermal ecosystem.  
722 *Frontiers in Microbiology* 4:67.  
723  
724 Kala S, Cumby N, Sadowski PD, Hyder BZ, Kanelis V, Davidson AR, Maxwell KL. 2014. HNH proteins  
725 are a widespread component of phage DNA packaging machines. *Proceedings of the National Academy of*  
726 *Sciences of the United States of America* 111(16):6022-6027.  
727  
728 Katoh K, Rozewicki J, Yamada KD. 2017. MAFFT online service: multiple sequence alignment, interactive  
729 sequence choice and visualization. *Briefings in Bioinformatics* bbx108.  
730  
731 Keller J, Leulliot N, Cambillau C, Campanacci V, Porciero S, Prangishvili D, Forterre P, Cortez D,  
732 Quevillon-Cheruel S, van Tilbeurgh H. 2007. Crystal structure of AFV3-109, a highly conserved protein  
733 from crenarchaeal viruses. *Virology* 4:12.  
734  
735 Képès F, Jester BC, Lepage T, Rafiei N, Rosu B, Junier I. 2012. The layout of a bacterial genome. *FEBS*  
736 *Letters* 586:2043-2048.  
737  
738 Koonin EV, Dolja VV. 2018. Metaviromics: a tectonic shift in understanding virus evolution. *Virus*  
739 *Research* 246:A1-A3.  
740  
741 Labrie S, Vukov N, Loessner MJ, Moineau S. 2004. Distribution and composition of the lysis cassette of  
742 *Lactococcus lactis* phages and functional analysis of bacteriophage  $\phi$ 36 holin. *FEMS Microbiology Letters*  
743 233(1):37-43.  
744  
745 Larson ET, Eilers BJ, Reiter D, Ortmann AC, Young MJ, Lawrence CM. 2007. A new DNA binding protein  
746 highly conserved in diverse crenarchaeal viruses. *Virology* 363:387-96.  
747  
748 Lima-Mendez G, Toussaint A, Leplae R. 2011. A modular view of the bacteriophage genomic space:  
749 identification of host and lifestyle marker modules. *Research in Microbiology* 162(8):737-46.  
750  
751 Marchler-Bauer A, Lu S, Anderson JB, Chitsaz F, et al. (27 co-authors). 2011. CDD: a Conserved Domain  
752 Database for the functional annotation of proteins. *Nucleic Acids Research* 39:D225-D229.  
753

- 754 McGinnis S, Madden TL. 2004. BLAST: at the core of a powerful and diverse set of sequence analysis  
755 tools. *Nucleic Acids Research* 32: W20-25.  
756
- 757 Mead DA, Monsma S, Mei B, Godwa K, Lodes M, Schoenfeld TW. 2018. Functional metagenomics of a  
758 replicase from a novel hyperthermophilic *Aquificales* virus. In Charles TC, Liles MR, Sestich A, eds.  
759 *Functional Metagenomics: Tools and Applications*. Springer, New York.  
760
- 761 Merrill BD, Ward AT, Grose JH, Hope S. 2016. Software-based analysis of bacteriophage genomes,  
762 physical ends, and packaging strategies. *BMC Genomics* 7:679.  
763
- 764 Miller-Coleman RL, Dodsworth JA, Ross CA, Shock EL, Williams AJ, Hartnett HE, McDonald AI, Havig  
765 JR, Hedlund BP. 2012. Korarchaeota diversity, biogeography, and abundance in Yellowstone and Great  
766 Basin hot springs and ecological niche modeling based on machine learning. *PLoS One* 7: e35964.  
767
- 768 Moser MJ, DiFrancesco RA, Gowda K, Klingele AJ, Sugar DR, Stocki S, Mead DA, Schoenfeld TW. 2012.  
769 Thermostable DNA polymerase from a viral metagenome is a potent RT-PCR enzyme. *PLoS One*  
770 7(6):e38371.  
771
- 772 Nishimura, Y., Yoshida, T., Kuronishi, M., Uehara, H., Ogata, H. and Goto, S. 2017. ViPTree: the viral  
773 proteomic tree server. *Bioinformatics* 33(15):2379-2380.  
774
- 775 Nordstrom DK, McCleskey RB, Ball JW. 2009. Sulfur geochemistry of waters in Yellowstone National  
776 Park: IV Acid-sulfate waters. *Applied Geochemistry* 24:191-207.  
777
- 778 O'Neill AH, Liu Y, Ferrera I, Beveridge TJ, Reysenbach AL. 2008. *Sulfurihydrogenibium rodmanii* sp.  
779 nov., a sulfur-oxidizing chemolithoautotroph from the Uzon Caldera, Kamchatka Peninsula, Russia, and  
780 emended description of the genus *Sulfurihydrogenibium*. *International Journal of Systematic and*  
781 *Evolutionary Microbiology* 58:1147-1152.  
782
- 783 Paez-Espino D, Eloie-Fadrosch EA, Pavlopoulos GA, Thomas AD, Huntemann M, Mikhailova N, Rubin E,  
784 Ivanova NN, Kyrpides NC. 2016. Uncovering Earth's virome. *Nature* 536:425-430.  
785
- 786 Prangishvili D. 2013. The wonderful world of archaeal viruses. *Annual Review of Microbiology* 67:565-  
787 85.

788  
789 Prevelige PE Jr, Cortines JR. 2018. Phage assembly and the special role of the portal protein. *Current*  
790 *Opinion in Virology* 31:66-73.  
791  
792 Rachel R, Bettstetter M, Hedlund BP, Häring M, Kessler A, Stetter KO, Prangishvili D. 2002. Remarkable  
793 morphological diversity of viruses and virus-like particles in hot terrestrial environments. *Archives of*  
794 *Virology* 147(12):2419-29.  
795  
796 Reysenbach AL, Wickham GS, Pace NR. 1994. Phylogenetic analysis of the hyperthermophilic pink  
797 filament community in Octopus Spring, Yellowstone National Park. *Applied and Environmental*  
798 *Microbiology* 60:2113-2119.  
799  
800 Reysenbach AL, Banta A, Civello S, Daly J, Mitchell K, Lalonde S, et al. 2005. "The *Aquificales* of  
801 Yellowstone National Park", in *Geothermal Biology and Geochemistry in Yellowstone National Park*, eds  
802 W.P. Inskeep and T.R. McDermott (Bozeman: Montana State University Thermal Biology Institute), 129-  
803 142.  
804  
805 Reysenbach AL, Hamamura N, Podar M, Griffiths E, Ferreira S, Hochstein R, Heidelberg J, Johnson J,  
806 Mead D, Pohorille A, Sarmiento M, Schweighofer K, Seshadri R, Voytek MA. 2009. Complete and draft  
807 genome sequences of six members of the *Aquificales*. *Journal Bacteriology* 191(6):1992-3.  
808  
809 Reysenbach AL, Ehringer M, Hershberger K. 2000. Microbial diversity at 83 degrees C in Calcite Springs,  
810 Yellowstone National Park: another environment where the *Aquificales* and "Korarchaeota" coexist.  
811 *Extremophiles* 4(1):61-7.  
812  
813 Rice G, Stedman K, Snyder J, Wiedenheft B, Willits D, Brumfield S, McDermott T, Young MJ. 2001.  
814 Viruses from extreme thermal environments. *Proceedings of the National Academy of Sciences of the*  
815 *United States of America* 98:13341-13345.  
816  
817 Rodriguez-R LM, Konstantinidis KT. 2016. The enveomics collection: a toolbox for specialized analyses  
818 of microbial genomes and metagenomes. *PeerJ Preprints*.  
819  
820 Rohwer F, Thurber RV. 2009. Viruses manipulate the marine environment. *Nature* 459:207–212.  
821



- 822 Romano C, D'Imperio S, Woyke T, Mavromatis K, Lasken R, Shock EL, McDermott TR. 2013.  
823 Comparative genomic analysis of phylogenetically closely related *Hydrogenobaculum* sp. isolates from  
824 Yellowstone National Park. *Applied Environmental Microbiology* 79:2932-43.  
825
- 826 Roux S, Hallam SJ, Woyke T, Sullivan MB. 2015. Viral dark matter and virus-host interactions resolved  
827 from publicly available microbial genomes. *Elife* 4.  
828
- 829 Roux S, Adriaenssens EM, Dutilh BE, Koonin EV, Kropinski AM, Krupovic M, Kuhn JH, Lavigne R,  
830 Brister JR, Varsani A, Amid C, Aziz RK, Bordenstein SR, Bork P, Breitbart M, Cochrane GR, Daly RA,  
831 Desnues C, Duhaime MB, Emerson JB, Enault F, Fuhrman JA, Hingamp P, Hugenholtz P, Hurwitz BL,  
832 Ivanova NN, Labonté JM, Lee KB, Malmstrom RR, Martinez-Garcia M, Mizrachi IK, Ogata H, Páez-  
833 Espino D, Petit MA, Putonti C, Rattei T, Reyes A, Rodriguez-Valera F, Rosario K, Schriml L, Schulz F,  
834 Steward GF, Sullivan MB, Sunagawa S, Suttle CA, Temperton B, Tringe SG, Thurber RV, Webster NS,  
835 Whiteson KL, Wilhelm SW, Wommack KE, Woyke T, Wrighton KC, Yilmaz P, Yoshida T, Young MJ,  
836 Yutin N, Allen LZ, Kyrpides NC, Eloe-Fadrosh EA. 2019. Minimum Information about an Uncultivated  
837 Virus Genome (MIUViG). *Nature Biotechnology* 37(1):29-37.  
838
- 839 Roux S, Krupovic M, Daly RA, Borges AL, Nayfach S, Schulz F, Sharrar A, Matheus Carnevali PB, Cheng  
840 JF, Ivanova NN, Bondy-Denomy J, Wrighton KC, Woyke T, Visel A, Kyrpides NC, Eloe-Fadrosh EA.  
841 2019. Cryptic inoviruses revealed as pervasive in bacteria and archaea across Earth's biomes. *Nature*  
842 *Microbiology* 4(11):1895-1906.  
843
- 844 Rozewicki J, Li S, Amada KM, Standley DM, Katoh K. 2019. MAFFT-DASH: integrated protein sequence  
845 and structural alignment. *Nucleic Acids Research*, 47(W1):W5–W10.  
846
- 847 Saier MH, Jr, Reddy BL. 2015. Holins in bacteria, eukaryotes, and archaea: multifunctional xenologues  
848 with potential biotechnological and biomedical applications. *Journal of Bacteriology* 197:7–17.  
849
- 850 Schoenfeld T, Patterson M, Richardson P, Wommack E, Young M, Mead DA. 2008. Assembly of viral  
851 metagenomes from Yellowstone hot Springs. *Applied Environmental Microbiology* 74:4164-4174.  
852
- 853 Schoenfeld TW, Murugapiran SK, Dodsworth JA, Floyd S, Lodes M, Mead DA, Hedlund BP. 2013. Lateral  
854 gene transfer of family-A DNA polymerases between thermophilic viruses, *Aquificae*, and *Apicomplexa*.  
855 *Molecular Biology and Evolution* 30(7):1653-1664.

856  
857 Shao Q, Trinh JT, McIntosh CS, Christenson B, Balázs G, Zeng L. 2017. Lysis-lysogeny coexistence:  
858 prophage integration during lytic development. *Microbiology Open* 6(1).  
859  
860 Seow F, Sato S, Janssen CS, Riehle MO, Mukhopadhyay A, Phillips RS, Wilson RJ, Barrett MP. 2005. The  
861 plastidic DNA replication enzyme complex of *Plasmodium falciparum*. *Molecular and Biochemical*  
862 *Parasitology* 141(2):145–153.  
863  
864 Snyder JC, Bateson MM, Lavin M, Young MJ. 2010. Use of cellular CRISPR (clusters of regularly  
865 interspaced short palindromic repeats) spacer-based microarrays for detection of viruses in environmental  
866 samples. *Applied Environmental Microbiology* 76(21):7251-8.  
867  
868 Spear JR, Walker JJ, McCollom TM, Pace NR. 2005. Hydrogen and bioenergetics in the Yellowstone  
869 geothermal ecosystem. *Proceedings of the National Academy of Sciences of the United States of America*  
870 102(7):2555–2560.  
871  
872 Stamatakis A. 2014. RAxML version 8: a tool for phylogenetic analysis and post-analysis of large  
873 phylogenies. *Bioinformatics* 30(9):1312-1313.  
874  
875 Stamereilers C, Fajardo CP, Walker JK, Mendez KN, Castro-Nallar E, Grose JH, Hope S, Tsourkas P. 2018.  
876 Genomic analysis of 48 *Paenibacillus larvae* bacteriophages. *Viruses* 10:377.  
877  
878 Suttle CA. 2007. Marine viruses--major players in the global ecosystem. *Nature Reviews Microbiology*  
879 5:801-12.  
880  
881 Takacs-Vesbach C, Inskeep WP, Jay ZJ, Herrgard MJ, Rusch DB, Tringe SG, Kozubal MA, Hamamura N,  
882 Macur RE, Fouke BW, Reysenbach AL, McDermott TR, Jennings RD, Hengartner NW, Xie G. 2013.  
883 Metagenome sequence analysis of filamentous microbial communities obtained from geochemically  
884 distinct geothermal channels reveals specialization of three *Aquificales* lineages. *Frontiers in Microbiology*  
885 4:84.  
886  
887 Trakselis MA, Alley SC, Abel-Santos E, Benkovic SJ. 2001. Creating a dynamic picture of the sliding  
888 clamp during T4 DNA polymerase holoenzyme assembly by using fluorescence resonance energy transfer.  
889 *Proceedings of the National Academy of Sciences of the United States of America* 98:8368-75.

890  
891 Vick TJ, Dodsworth JA, Costa KC, Shock EL, Hedlund BP. 2010. Microbiology and geochemistry of Little  
892 Hot Creek, a hot spring environment in the Long Valley Caldera. *Geobiology* 8:140-154.  
893  
894 Walker JE, Saraste M, Runswick MJ, Gay NJ. 1982. Distantly related sequences in the alpha- and beta-  
895 subunits of ATP synthase, myosin, kinases and other ATP-requiring enzymes and a common nucleotide  
896 binding fold. *The EMBO Journal* 1(8):945–951.  
897  
898 Weigel C, Seitz H. 2006. Bacteriophage replication modules. *FEMS Microbiology Reviews* 30:321-81.  
899  
900 Xie Y, Wu L, Wang M, Cheng A, Yang Q, Wu Y, Jia R, Zhu D, Zhao X, Chen S, Liu M, Zhang S, Wang  
901 Y, Xu Z, Chen Z, Zhu L, Luo Q, Liu Y, Yu Y, Zhang L, Chen X. 2019. Alpha-Herpesvirus thymidine  
902 kinase genes mediate viral virulence and are potential therapeutic targets. *Frontiers in Microbiology* 10:941.  
903  
904 Young R. 2014. Phage lysis: three steps, three choices, one outcome. *Journal of Microbiology* 52(3): 243–  
905 258.  
906  
907 Zhou EM, Adegboruwa AL, Mefferd CC, Bhute SS, Murugapiran SK, Dodsworth JA, Thomas SC,  
908 Bengtson AJ, Liu L, Xian WD, Li WJ, Hedlund BP. 2019. Diverse respiratory capacity among *Thermus*  
909 strains from US Great Basin hot springs. *Extremophiles* 24:71-80.

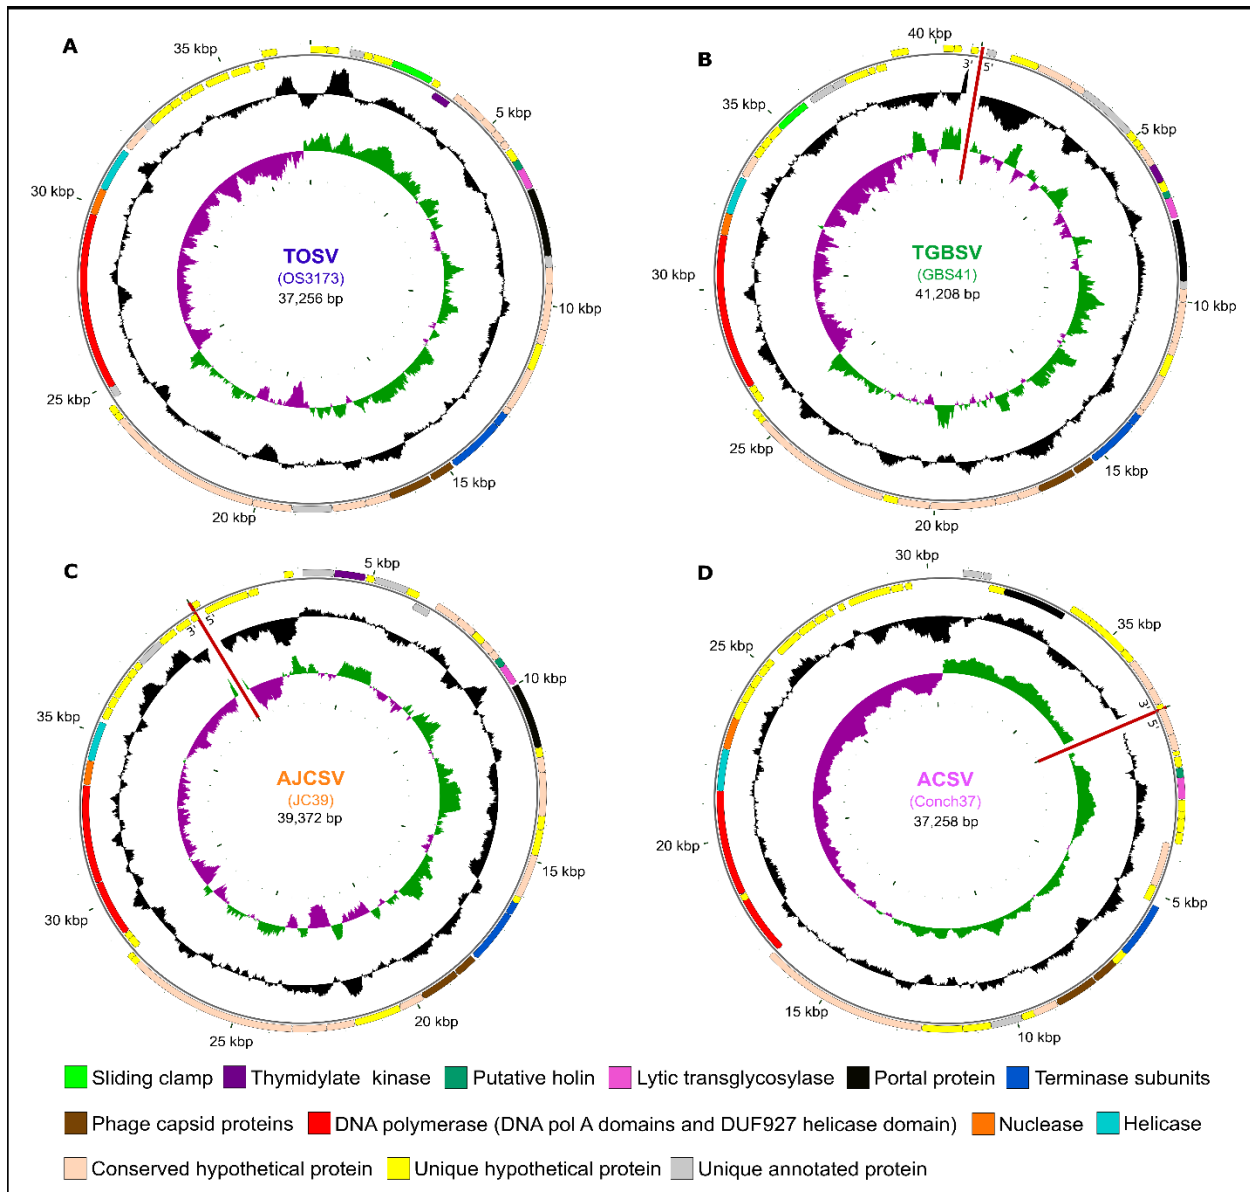

910

911 **Figure 1. Map of four large UViGs.** The uncultivated viral genomes were recovered from metagenomes  
 912 from (A) Octopus Spring (TOSV); (B) Great Boiling Spring (TGBSV); (C) Joseph's Coat Spring (AJCSV);  
 913 and (D) Conch Spring (ACSV). Outer circles show ORFs and selected annotation features, with arrows in  
 914 the putative direction of transcription. Middle circles show the GC content and the inner circles show the  
 915 GC skew. The sequences of GBS41, JC39 and Conch37 could not be circularized as indicated with red  
 916 lines. Maps have been rotated to reflect the orientation of OS3173. TOSV, TGBSV, AJCSV, and ACSV  
 917 are represented by OS3173, GBS41, JC39, and Conch37, respectively.

918

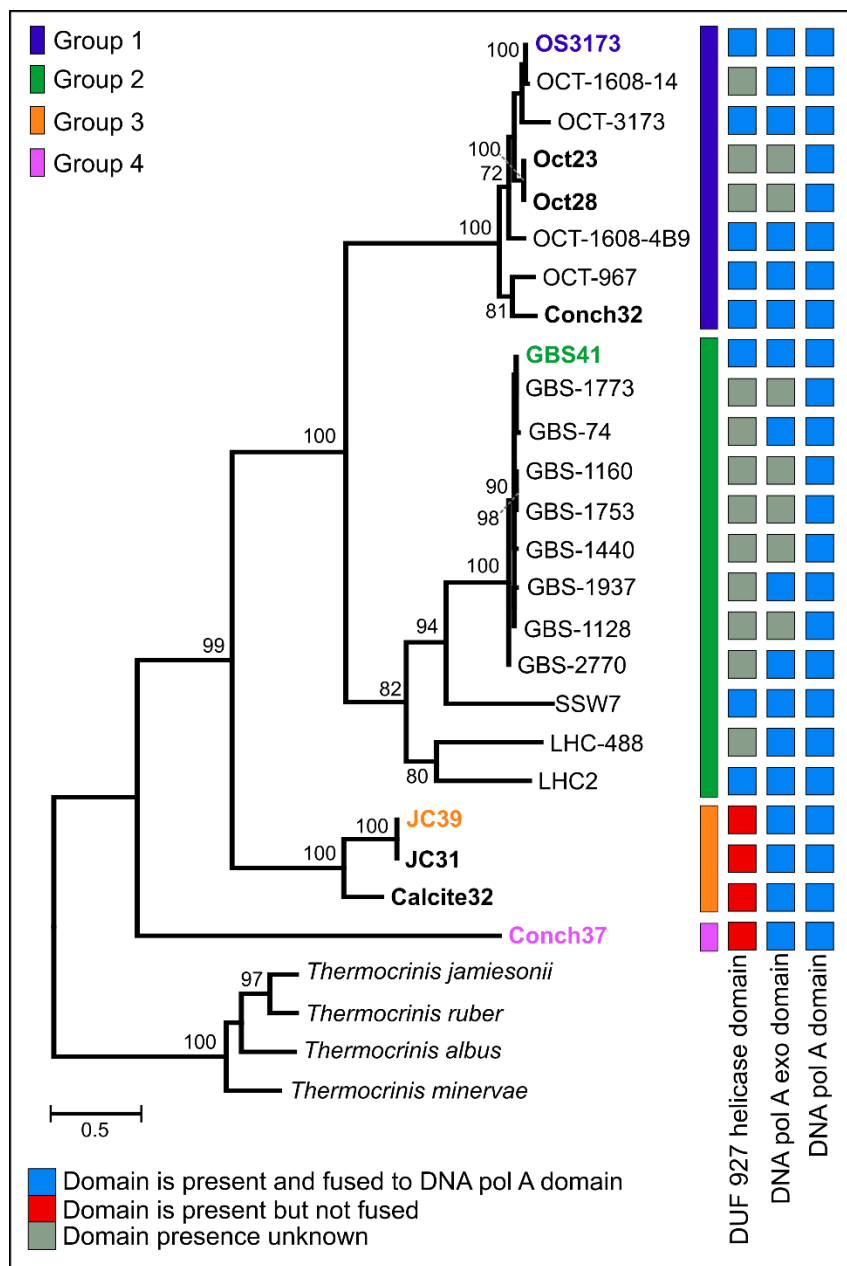

919 **Figure 2. Phylogeny and structure of 3173 PolA-like proteins.** Maximum-likelihood phylogeny of near  
 920 full-length 3173 PolA-like proteins, with bootstrap values above 70% from 1,000 pseudoreplicates  
 921 indicated. OCT, Oct or OS, Octopus Spring; Conch, Conch Spring; GBS, Great Boiling Spring; SSW,  
 922 Sandy's Spring West; LHC, Little Hot Creek; JC, Joseph's Coat Spring; Calcite, Calcite Spring. The  
 923 presence of helicase, exonuclease, and polymerase domains are indicated, where known. The scale bar  
 924 indicates the number of amino acid changes per site. Taxa indicated in bold represent UViGs that were  
 925 >23kb, while the representative UViG of each group is colored in the corresponding group color. OS3173,  
 926 GBS41, JC39, and Conch37 represent TOSV, TGBSV, AJCSV, and ACSV, respectively.

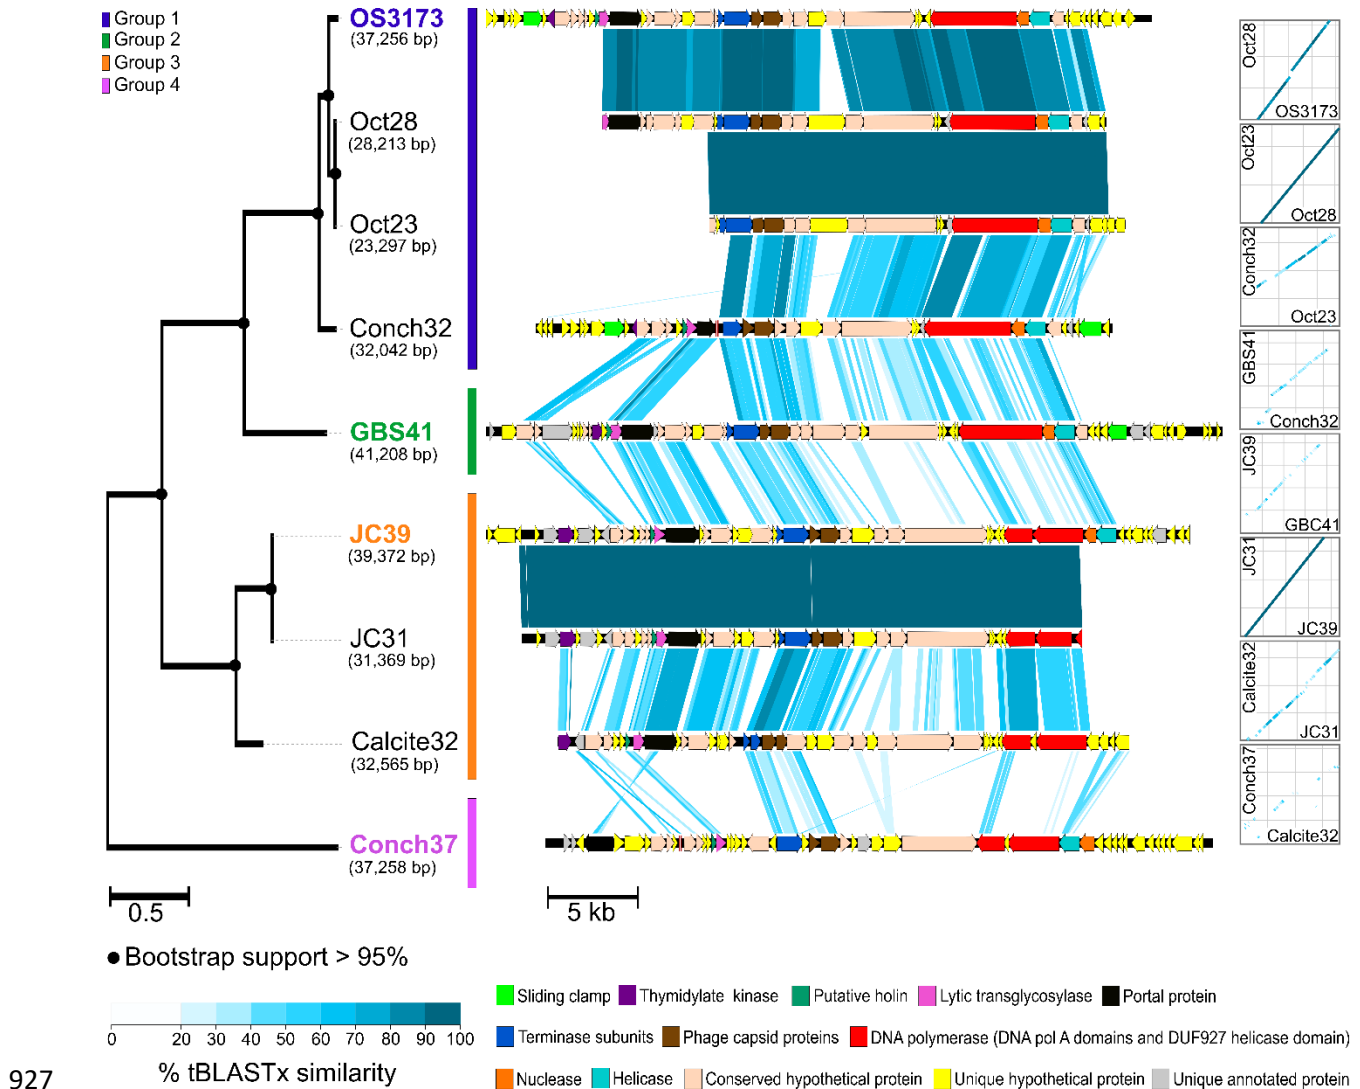



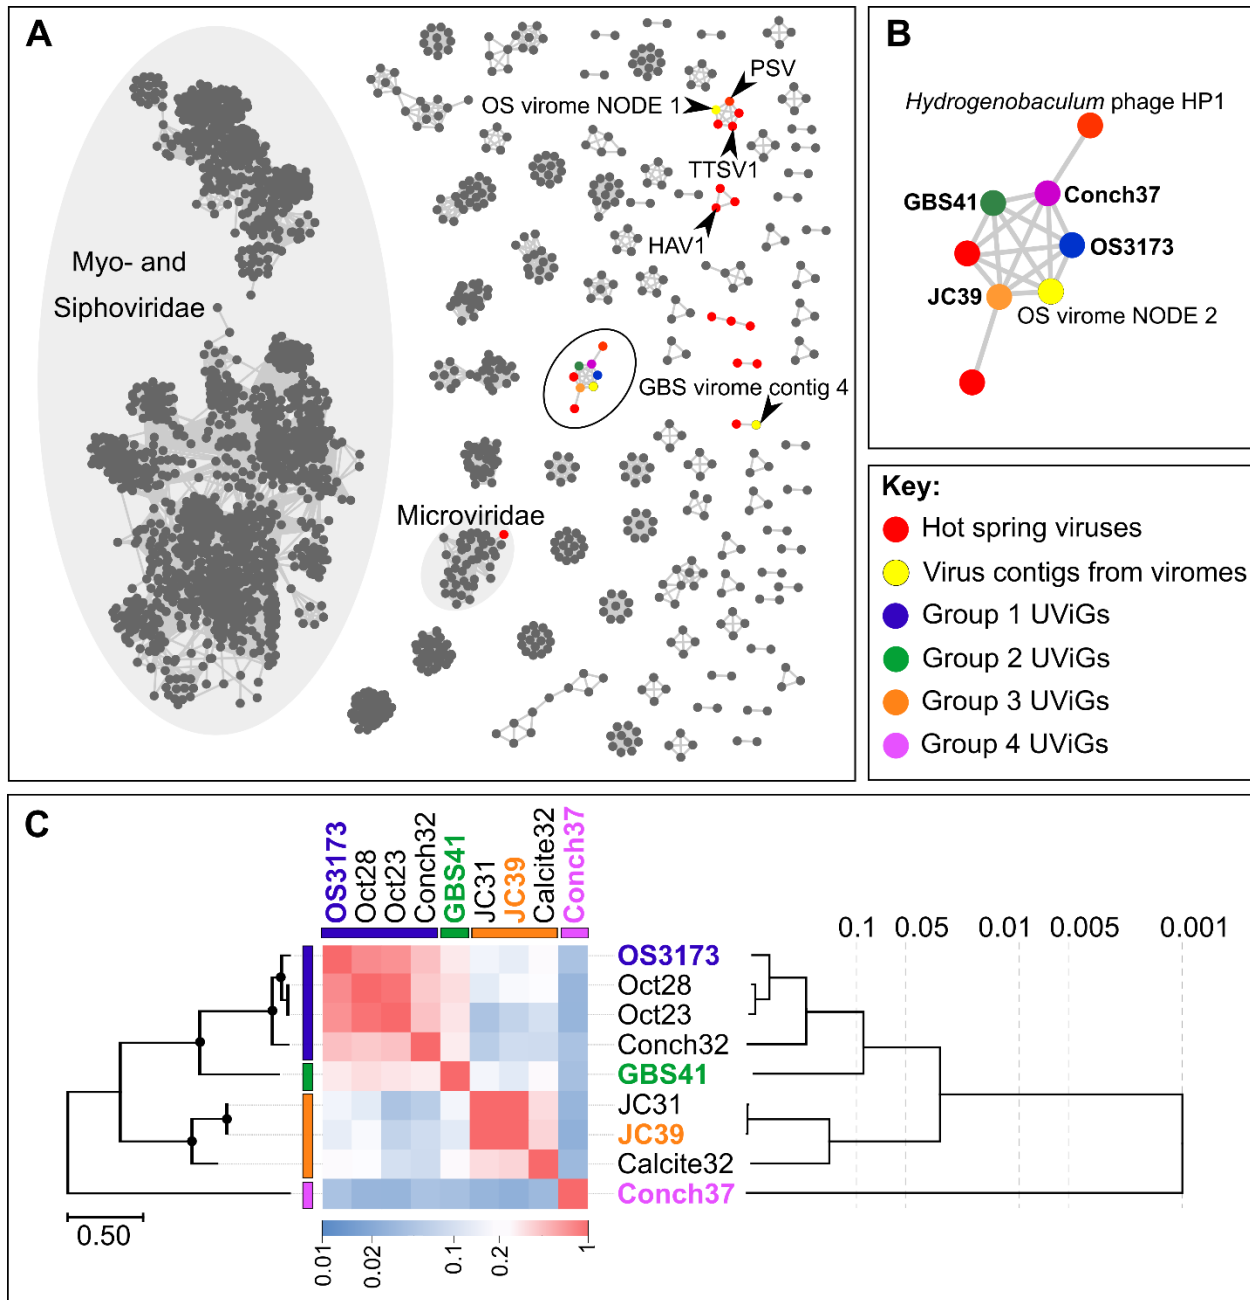

935

936 **Figure 4. Relatedness inferred from gene-content between the OS3173-like UViGs.** (A) Gene-sharing  
 937 network inferred by vContact2 and visualized with Cytoscape 3.7.2. Nodes in the network represent  
 938 cultivated or uncultivated viral genomes, while edges represent shared gene content between nodes. Viral  
 939 contigs identified from hot spring microbial genomes are indicated in red, while contigs from either the  
 940 Octopus Spring or Great Boiling Spring virus-enriched metagenomes are indicated in yellow (see Figure  
 941 S4-7, File S1). The four representative UViGs are color-coded in their respective group colors. PSV,  
 942 *Pyrobaculum* spherical virus; TTSV1, *Thermoproteus tenax* spherical virus 1; HAV1, Hyperthermophilic

943 Archaeal virus 1. (B) Component of the gene-sharing network [circled in black on (A)] connecting the four  
944 representative UViGs together with the two outlier viruses, *Hydrogenobaculum* phage HP1 and another  
945 uncultivated virus from a pink streamer microbial community metagenome from Octopus Spring. One  
946 additional viral contig of the Octopus Spring virus-enriched metagenome was connected to the genus-level  
947 group Pyrovirus (OS virome NODE 2). (C) Genomic relatedness among the nine related UViGs based on  
948 normalized tBLASTx scores across the genomes (heatmap) with the PolA phylogeny depicted on left of  
949 the figure and a BioNJ phylogeny inferred from tBLASTx scores on the right. Bootstrap values above 95%  
950 on the polA phylogeny are indicated with circles at nodes. The phylogeny based on normalized tBLASTx  
951 scores of these UViGs, and their placement within the dsDNA viral reference sequences database, is  
952 indicated in Figure S3. OS3173, GBS41, JC39, and Conch37 represent TOSV, TGBSV, AJCSV, and  
953 ACSV, respectively.

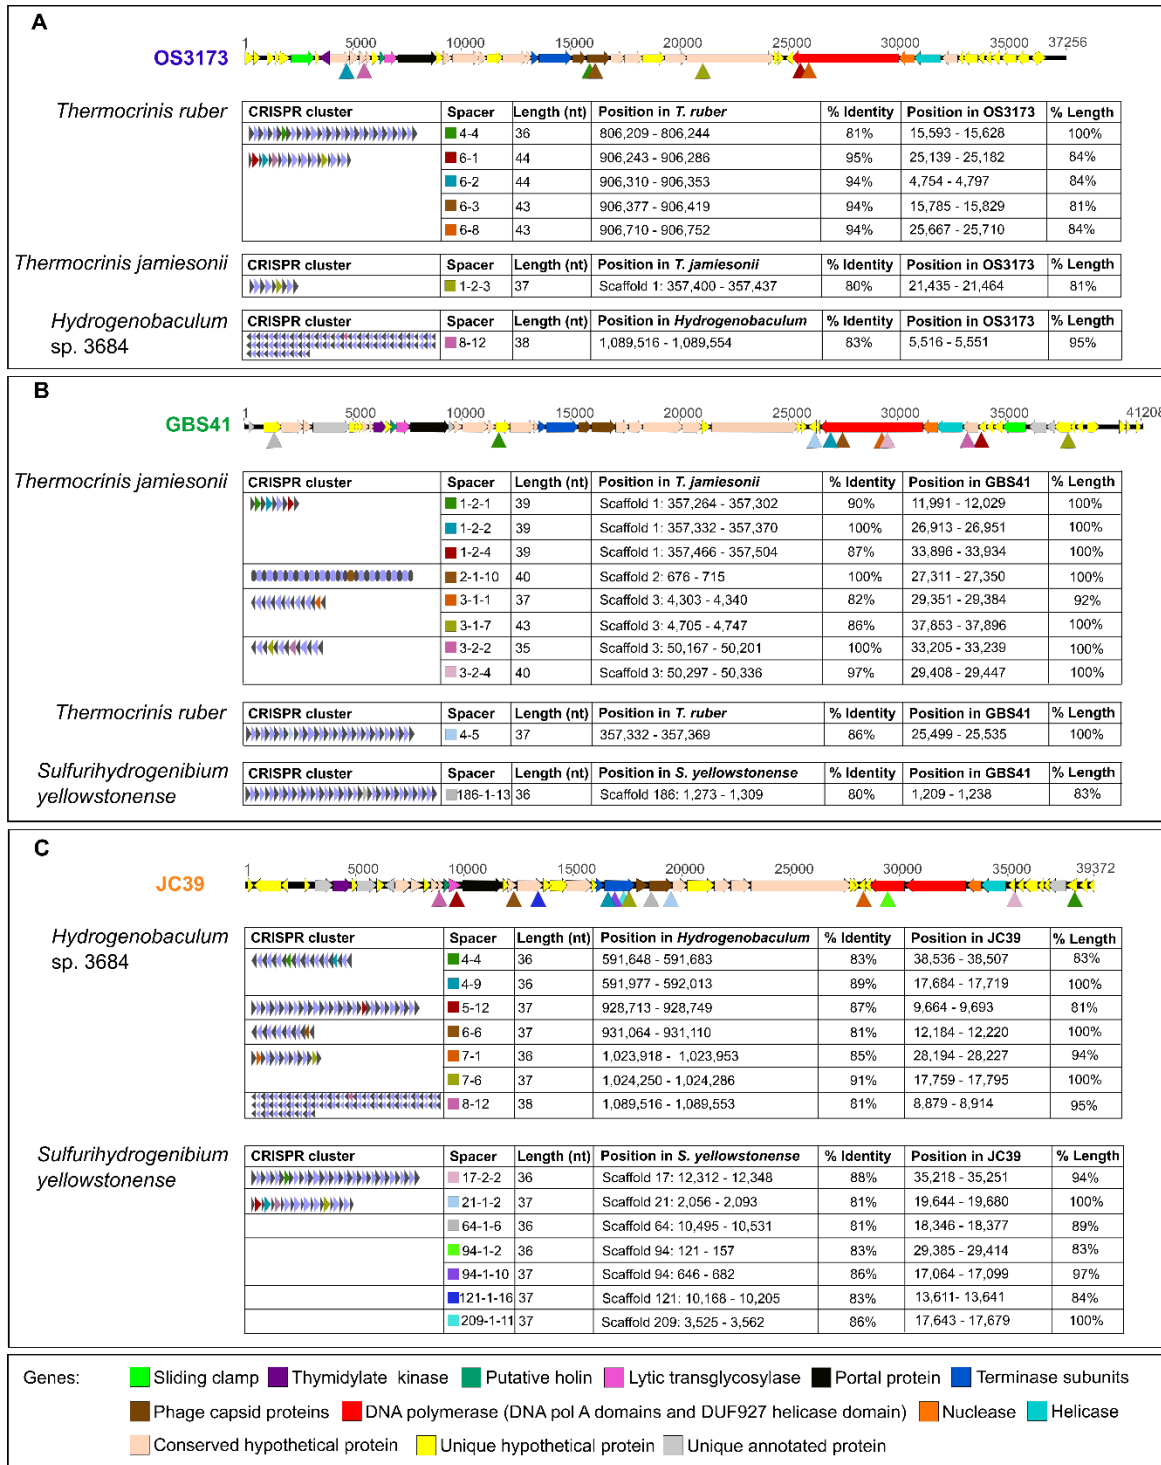

954

955 **Figure 5. CRISPR spacer matches between viruses and *Aquificae* genomes.** (A) Linearized map of the  
 956 OS3173 genome with sites matching *Thermocrinis ruber* OC1/4<sup>T</sup>, *Thermocrinis jamiesonii* GBS1<sup>T</sup>, and  
 957 *Hydrogenobaculum* sp. 3684 CRISPR spacer sequences denoted by triangles, and schematic and data on  
 958 matching spacers. (B) Similar plot of the GBS41 genome with sites matching *Thermocrinis jamiesonii*

959 GBS1<sup>T</sup>, *Thermocrinis ruber* OC1/4<sup>T</sup>, and *Sulfurihydrogenibium yellowstonense* SS-5<sup>T</sup> CRISPR spacers. (C)  
960 Linearized map of the JC39 genome with corresponding CRISPR spacer sequence matches to  
961 *Hydrogenobaculum* sp. 3684 and *Sulfurihydrogenibium yellowstonense* SS-5<sup>T</sup>. OS3173, GBS41, and  
962 Conch37 represent TOSV, TGBSV, and ACSV, respectively.

963 **TABLE 1. Distribution of OS3173-like *polA* genes in metagenomic databases.**

|                           | Hot spring       | Temp. (°C) | pH  | % AA ID <sup>a</sup> | Largest scaffolds (kbp) | Genbank or IMG Accession                                                                                      |
|---------------------------|------------------|------------|-----|----------------------|-------------------------|---------------------------------------------------------------------------------------------------------------|
| Yellowstone National Park | Octopus          | 85         | 8.0 | 82-90                | 37, 28, 23              | <a href="#">MK783188.1</a> ,<br><a href="#">JGI20132J14458_1000016</a> ,<br><a href="#">Ga0080007_1084535</a> |
|                           | Conch            | 85         | 8.8 | 66-91                | 37, 32                  | <a href="#">Ga0080008_153848</a> ,<br><a href="#">Ga0080008_158027</a>                                        |
|                           | Joseph's Coat    | 80         | 6.1 | 25-37                | 39, 31                  | <a href="#">Ga0080003_1000231</a> ,<br><a href="#">JGI20128J18817_1000068</a>                                 |
|                           | Bath             | 85         | 8.0 | 70-94                | 1                       | <a href="#">2007311021</a>                                                                                    |
|                           | Black Pool       | 73         | 8.0 | 56-89                | 8                       | <a href="#">Ga0111098_10004</a>                                                                               |
|                           | Calcite          | 75         | 7.8 | 39-49                | 32                      | <a href="#">YNPsite12_CeleraDRAF_scf1119014592999</a>                                                         |
|                           | Bechler          | 81         | 7.8 | 83-92                | 0.7                     | <a href="#">YNPsite13_CeleraDRAF_29640</a>                                                                    |
| U.S. Great Basin          | Great Boiling    | 80         | 6.4 | 35-50                | 41                      | <a href="#">Ga0097684_1000009</a>                                                                             |
|                           | Sandy's West     | 86.6       | 7.0 | 34-57                | 7                       | <a href="#">Ga0105155_1001723</a>                                                                             |
|                           | Little Hot Creek | 82         | 6.8 | 33-50                | 2                       | <a href="#">Ga0105158_1016092</a>                                                                             |

964 <sup>a</sup> Range of amino acid identities to the full-length OS3173 Pol based on tBlastx.

965 **TABLE 2. Summary of genomic features from four representative viral UViGs.**

| UViG                      | Source                      | Length | %GC   | Number<br>of genes | %<br>Coding | Proteins w/<br>function | % Proteins<br>w/ function |
|---------------------------|-----------------------------|--------|-------|--------------------|-------------|-------------------------|---------------------------|
| <b>TOSV<br/>(OS3173)</b>  | Octopus<br>Spring, WY       | 37,265 | 37.1% | 49                 | 95.1%       | 21                      | 35%                       |
| <b>TGBSV<br/>(GBS41)</b>  | Great Boiling<br>Spring, NV | 41,208 | 36.9% | 53                 | 94.5%       | 19                      | 36%                       |
| <b>AJCSV<br/>(JC39)</b>   | Joseph's Coat<br>Spring, WY | 39,372 | 34.0% | 51                 | 96.5%       | 17                      | 33%                       |
| <b>ACSV<br/>(Conch37)</b> | Conch Spring,<br>WY         | 37,258 | 35.5% | 50                 | 94.8%       | 15                      | 30%                       |

966



967 **TABLE 3. Minimum Information about Uncultivated Virus Genomes (MIUViG) for the four**  
 968 **representative UViGs.**

| Metadata                             | TOSV (OS3173)                                                        | TGBSV (GBS41)                                                  | AJCSV (JC39)                                                         | ACSV (Conch37)                                                       |
|--------------------------------------|----------------------------------------------------------------------|----------------------------------------------------------------|----------------------------------------------------------------------|----------------------------------------------------------------------|
| <b>Source of UViG</b>                | Viral fraction metagenome (virome)                                   | Metagenome (not viral targeted)                                | Metagenome (not viral targeted)                                      | Metagenome (not viral targeted)                                      |
| <b>Sequencing approach</b>           | Roche 454                                                            | 454 GS FLX Titanium                                            | Illumina HiSeq 2000, 2500                                            | Illumina HiSeq 2000, 2500                                            |
| <b>Assembly software</b>             | CLC Genomics 8.0 (word size = 20, bubble size = 375), SPAdes v3.13.1 | SPAdes v 3.6.1                                                 | SPAdes v 3.10.0 (--meta --only-assembler -k 21, 33, 55, 77, 99, 127) | SPAdes v 3.10.0 (--meta --only-assembler -k 21, 33, 55, 77, 99, 127) |
| <b>Viral identification software</b> | VirSorter, Earth's Virome pipeline, Inovirus detector pipeline       | VirSorter, Earth's Virome pipeline, Inovirus detector pipeline | VirSorter, Earth's Virome pipeline, Inovirus detector pipeline       | VirSorter, Earth's Virome pipeline, Inovirus detector pipeline       |
| <b>Predicted genome type</b>         | dsDNA                                                                | dsDNA                                                          | dsDNA                                                                | dsDNA                                                                |
| <b>Predicted genome structure</b>    | Non-segmented                                                        | Non-segmented                                                  | Non-segmented                                                        | Non-segmented                                                        |
| <b>Detection type</b>                | Independent sequence (UViG)                                          | Independent sequence (UViG)                                    | Independent sequence (UViG)                                          | Independent sequence (UViG)                                          |
| <b>Assembly quality</b>              | Finished                                                             | High-quality draft                                             | High-quality draft                                                   | High-quality draft                                                   |
| <b>Number of contigs</b>             | 1                                                                    | 1                                                              | 1                                                                    | 1                                                                    |

969
